# Supplementary material for: Changes in ferrous iron and glutathione promote ferroptosis and frailty in aging Caenorhabditis elegans
Source: eLife journal article supplement (doi:10.7554/elife.56580), 2020-07-20

# A

6 whole worms

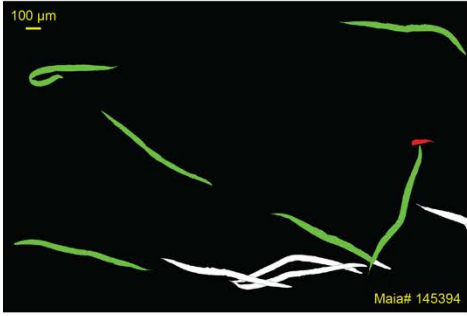

1 whole worm

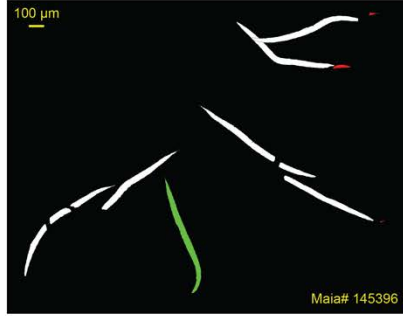

1 whole worms

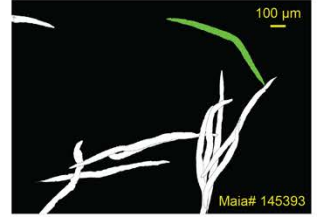

1 whole worm

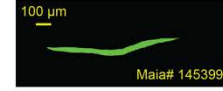

1 whole worms

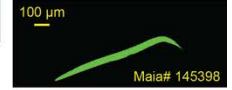

3 whole worms

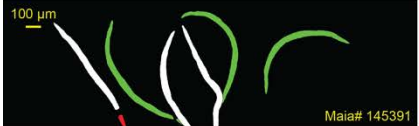

3 whole worms

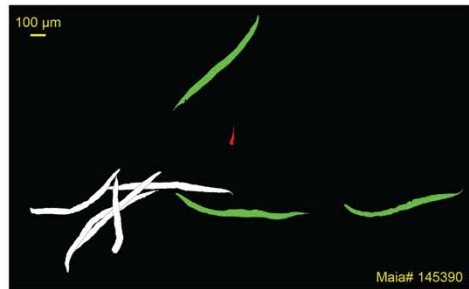

3 whole worms

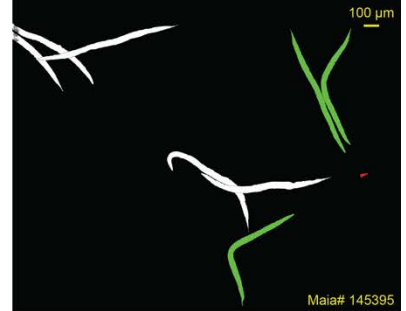

5 whole worms

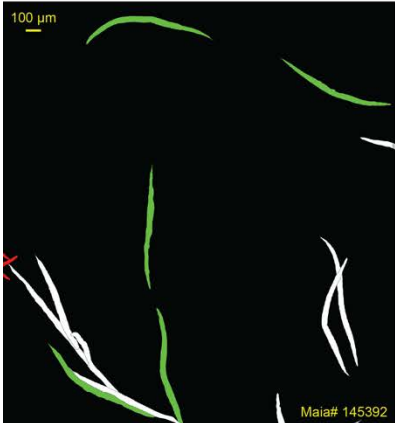

6 whole worms

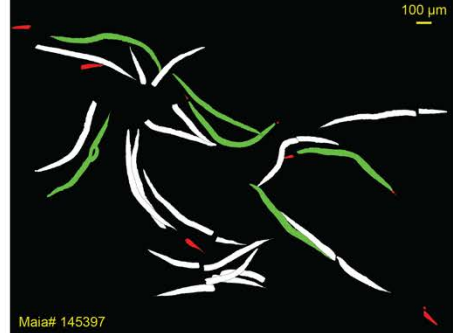

3 whole worms

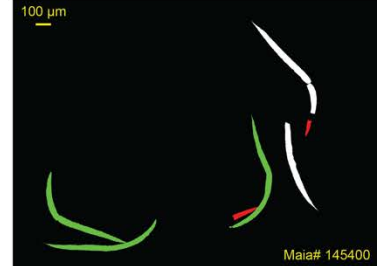

## B

11 whole worms

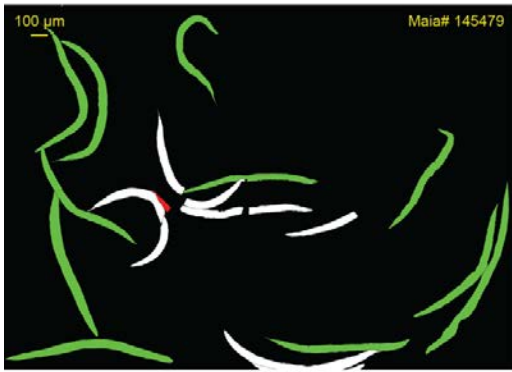

6 whole worms

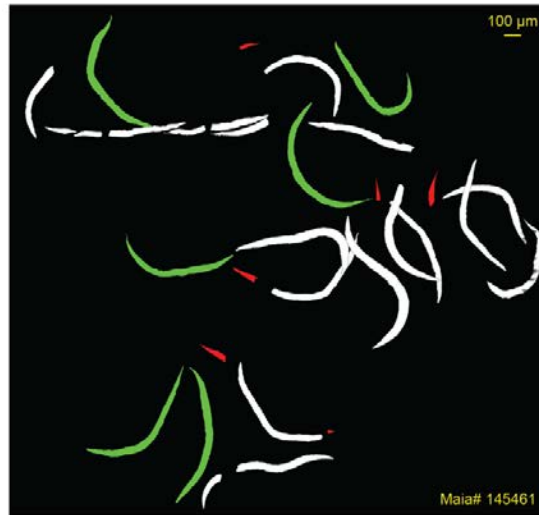

1 whole worm

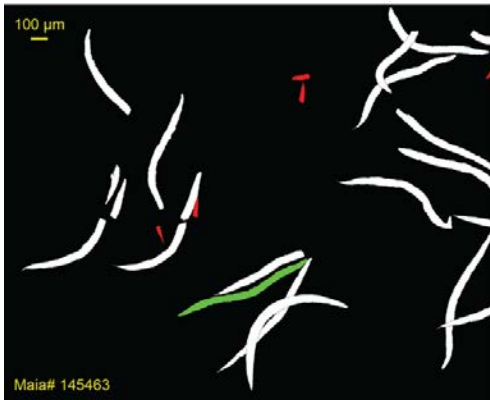

2 whole worm

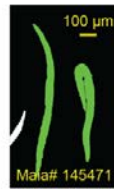

1 whole worm

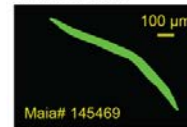

## C

1 whole worm

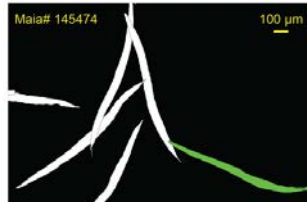

15 whole worm

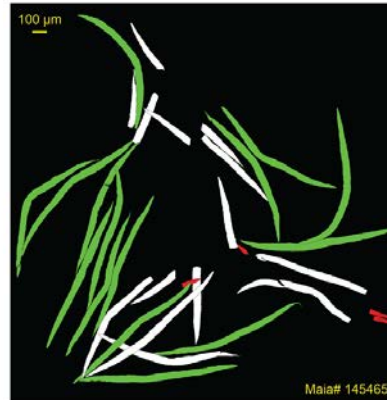

5 whole worm

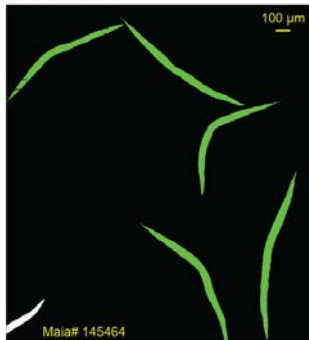

3 whole worm

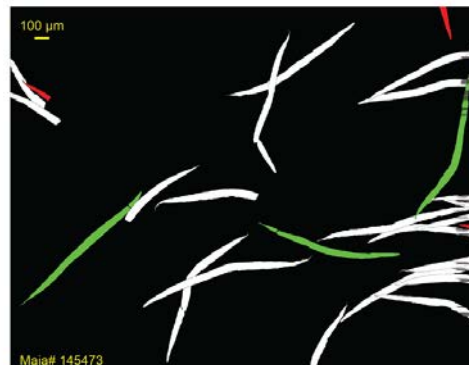

4 whole worm

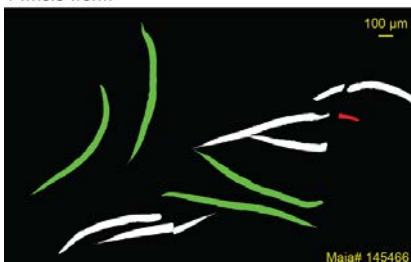

# D

10 whole worms

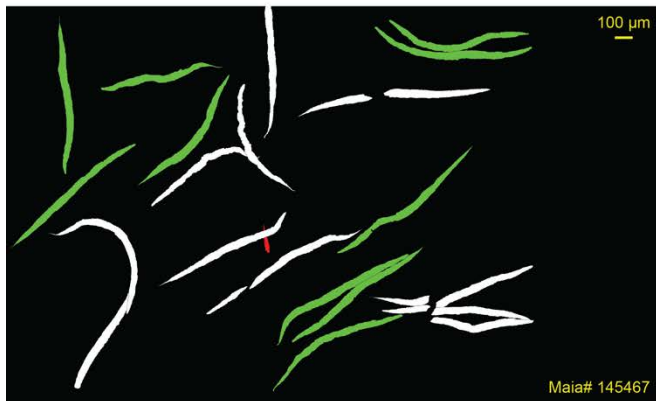

7 whole worms

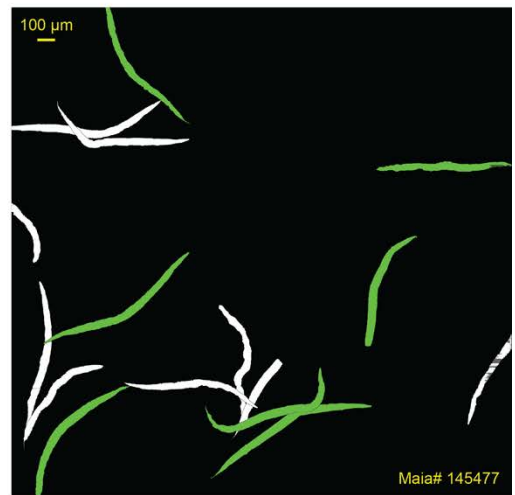

2 whole worms

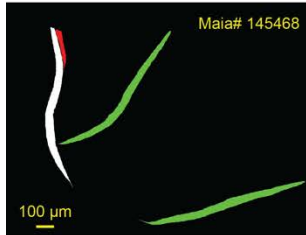

0 whole worms

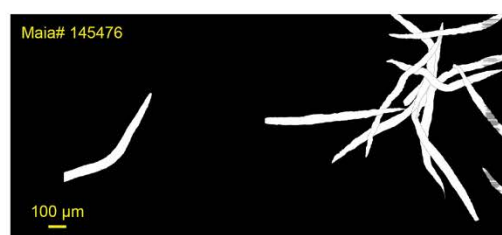

0 whole worms

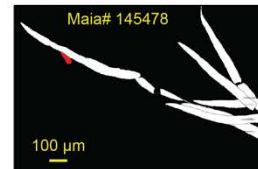

1 whole worm

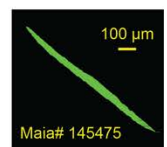

# E

5 whole worms

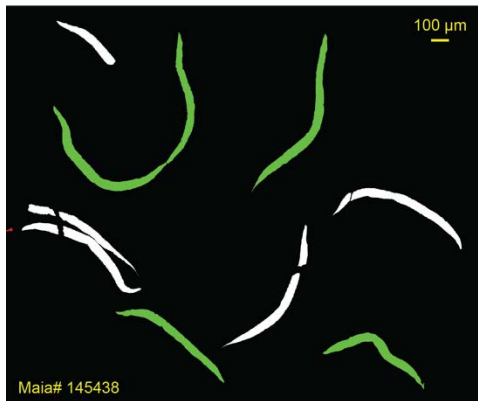

1 whole worm

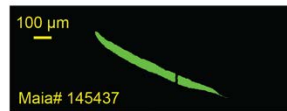

2 whole worms

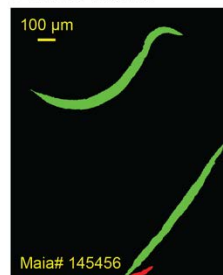

1 whole worm

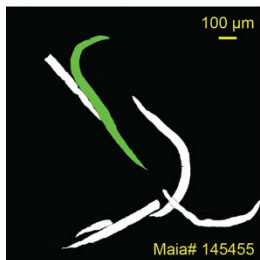

3 whole worm

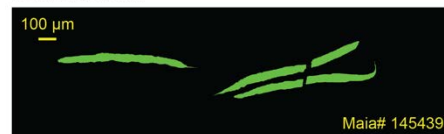

# F

7 whole worms

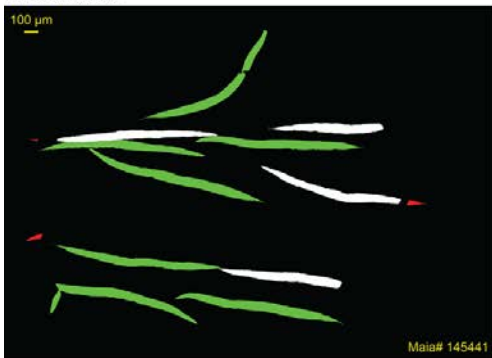

2 whole worms

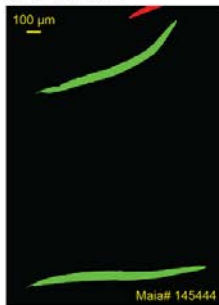

4 whole worms

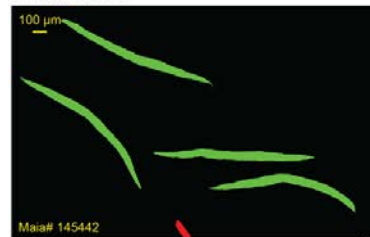

1 whole worm

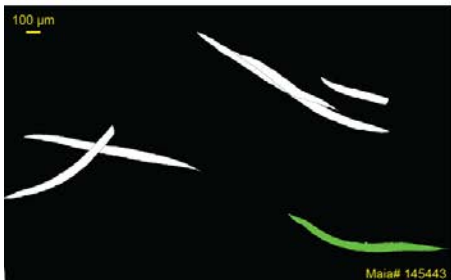

1 whole worm

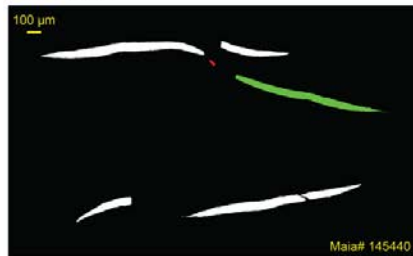

1 whole worm

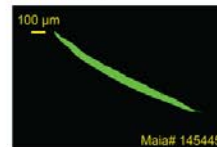

# G

5 whole worms

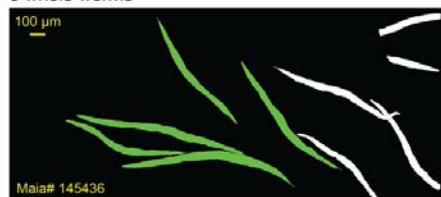

4 whole worms

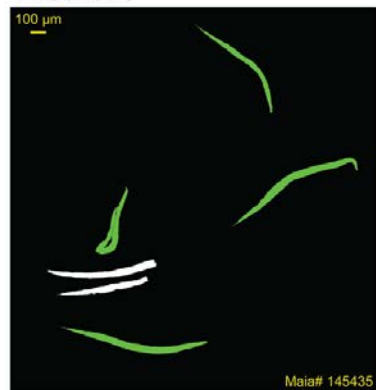

2 whole worms

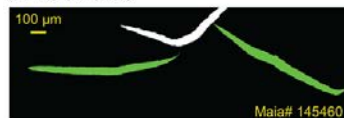

1 whole worm

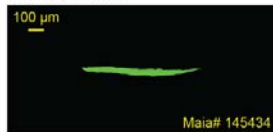

6 whole worms

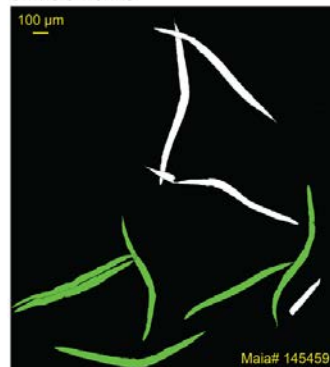

7 whole worms

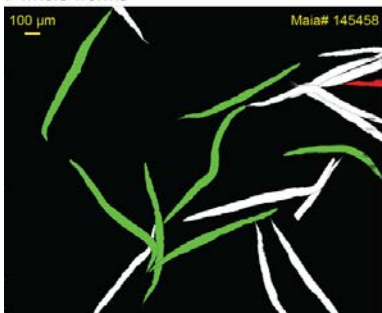

Supplement: supp7 [file elife-56580-supp7-v1.pdf]
