# Supplementary material for: Changes in ferrous iron and glutathione promote ferroptosis and frailty in aging Caenorhabditis elegans
Source: eLife. 2020 Jul 21;9:e56580. doi: 10.7554/eLife.56580 (PMC7373428; doi:10.7554/eLife.56580)
Supplement: Figure 1—source data 1. [file elife-56580-fig1-data1.xlsx]

## Sheet: DEM data
Fig 1A
	24 hours							48 hours
	N	alive	dead	% Dead	Lower	Upper		N	alive	dead	% alive	Lower	Upper
control (no DEM)	202	197	5	0.0247525	0.0106	0.0567		198	182	16	0.0808081	0.0503	0.1272
1 mM	196	191	5	0.0255102	0.0109	0.0583		190	173	17	0.0894737	0.0566	0.1386
5 mM	170	146	24	0.141176	0.0968	0.2015		160	103	57	0.35625	0.2863	0.4331
10 mM	195	111	84	0.430769	0.3633	0.501		195	4	191	0.979487	0.9485	0.992
15 mM	102	4	98	0.960784	0.9035	0.9847		102	0	102	1	0.9637	1
20 mM	198	1	197	0.994949	0.9719	0.9991		198	0	198	1	0.981	1
Fig 1B
Relative GSH versus DEM treatment
	0.5%DMSO (Veh Ctl)
	[total protein] in µg	9.60714	11.25	9.89286	11.4643	12.75	14.25
	Kinetic read	#1	#2	#3	#4	#5	#6
	00:00:00	0.173	0.178	0.164	0.194	0.193	0.191
	00:01:00	0.197	0.202	0.184	0.225	0.223	0.221
	00:02:00	0.223	0.227	0.207	0.255	0.251	0.248
	00:03:00	0.249	0.253	0.229	0.287	0.28	0.277
	00:04:00	0.277	0.278	0.251	0.318	0.31	0.307
	00:05:00	0.305	0.304	0.276	0.35	0.341	0.337
	00:06:00	0.333	0.332	0.3	0.383	0.373	0.368
	00:07:00	0.361	0.359	0.325	0.416	0.405	0.398
	00:08:00	0.391	0.387	0.351	0.45	0.437	0.429
	00:09:00	0.42	0.416	0.377	0.484	0.469	0.461
	00:10:00	0.449	0.444	0.404	0.519	0.504	0.496
	0.5%DMSO + 5mM DEM
	[total protein] in µg	10.8214	10.6071	10.1786	10.1786	10.8214	12.8929
	Kinetic read	#1	#2	#3	#4	#5	#6
	00:00:00	0.152	0.15	0.141	0.15	0.147	0.172
	00:01:00	0.171	0.168	0.158	0.171	0.166	0.197
	00:02:00	0.191	0.187	0.175	0.19	0.186	0.222
	00:03:00	0.211	0.207	0.192	0.212	0.205	0.246
	00:04:00	0.233	0.227	0.211	0.234	0.227	0.273
	00:05:00	0.255	0.248	0.231	0.256	0.248	0.3
	00:06:00	0.278	0.268	0.25	0.278	0.269	0.327
	00:07:00	0.301	0.29	0.27	0.301	0.291	0.355
	00:08:00	0.325	0.312	0.29	0.324	0.314	0.383
	00:09:00	0.348	0.333	0.311	0.348	0.337	0.411
	00:10:00	0.374	0.355	0.333	0.372	0.361	0.443
	0.5%DMSO + 10mM DEM
	[total protein] in µg	11.25	9.75	9.75	11.4643	12.6071	13.6071
	Kinetic read	#1	#2	#3	#4	#5	#6
	00:00:00	0.147	0.13	0.127	0.143	0.153	0.146
	00:01:00	0.163	0.143	0.139	0.16	0.17	0.164
	00:02:00	0.182	0.157	0.154	0.177	0.188	0.182
	00:03:00	0.2	0.172	0.165	0.196	0.205	0.2
	00:04:00	0.219	0.186	0.18	0.213	0.225	0.219
	00:05:00	0.238	0.202	0.194	0.232	0.245	0.238
	00:06:00	0.259	0.217	0.209	0.251	0.265	0.258
	00:07:00	0.279	0.233	0.224	0.271	0.285	0.278
	00:08:00	0.3	0.25	0.24	0.291	0.305	0.3
	00:09:00	0.32	0.265	0.255	0.311	0.327	0.32
	00:10:00	0.343	0.282	0.272	0.331	0.349	0.343
	0.5%DMSO + 20mM DEM
	[total protein] in µg	13.9643	10.9643	9.46429	10.8929	12.3214	16.0357
	Kinetic read	#1	#2	#3	#4	#5	#6
	00:00:00	0.135	0.099	0.128	0.121	0.116	0.134
	00:01:00	0.142	0.107	0.135	0.131	0.124	0.139
	00:02:00	0.15	0.113	0.143	0.14	0.133	0.148
	00:03:00	0.158	0.12	0.15	0.15	0.141	0.157
	00:04:00	0.163	0.127	0.16	0.162	0.15	0.166
	00:05:00	0.171	0.135	0.168	0.172	0.159	0.176
	00:06:00	0.182	0.142	0.178	0.184	0.169	0.188
	00:07:00	0.198	0.15	0.189	0.195	0.179	0.199
	00:08:00	0.221	0.158	0.2	0.206	0.189	0.211
	00:09:00	0.253	0.166	0.211	0.215	0.199	0.222
	00:10:00	0.291	0.174	0.224	0.226	0.209	0.24
Fig 1C
Relative GSH versus age	TJ1060 D-1 adults
	[Total protein] in µg	9.37778	11.1	10.4333	9.87778	11.5444	13.8667
	Kinetic read	#1	#2	#3	#4	#5	#6
	00:00:00	0.338	0.356	0.371	0.338	0.335	0.377
	00:01:00	0.406	0.427	0.446	0.41	0.402	0.452
	00:02:00	0.478	0.502	0.525	0.484	0.468	0.529
	00:03:00	0.551	0.571	0.604	0.557	0.538	0.609
	00:04:00	0.626	0.643	0.686	0.633	0.608	0.686
	00:05:00	0.702	0.718	0.765	0.709	0.676	0.765
	00:06:00	0.777	0.789	0.846	0.785	0.748	0.846
	00:07:00	0.854	0.864	0.926	0.859	0.819	0.928
	00:08:00	0.928	0.938	1.007	0.937	0.887	1.009
	00:09:00	1.007	1.015	1.089	1.013	0.959	1.091
	00:10:00	1.082	1.09	1.168	1.089	1.025	1.179
	TJ1060 D-4 adults
	[Total protein] in µg	9.76667	9.48889	9.21111	10.2111	8.6	9.37778
	Kinetic read	#1	#2	#3	#4	#5	#6
	00:00:00	0.309	0.285	0.31	0.324	0.306	0.272
	00:01:00	0.371	0.341	0.368	0.387	0.364	0.322
	00:02:00	0.434	0.396	0.429	0.449	0.42	0.382
	00:03:00	0.502	0.45	0.492	0.512	0.48	0.437
	00:04:00	0.57	0.506	0.557	0.578	0.54	0.495
	00:05:00	0.637	0.561	0.619	0.642	0.598	0.553
	00:06:00	0.707	0.619	0.684	0.709	0.66	0.611
	00:07:00	0.775	0.676	0.749	0.775	0.722	0.669
	00:08:00	0.845	0.735	0.814	0.843	0.778	0.729
	00:09:00	0.915	0.795	0.881	0.911	0.836	0.791
	00:10:00	0.987	0.856	0.946	0.978	0.894	0.855
	TJ1060 D-8 adults
	[Total protein] in µg	12.1	12.2667	10.1556	11.5444	12.3222	12.6
	Kinetic read	#1	#2	#3	#4	#5	#6
	00:00:00	0.272	0.283	0.27	0.273	0.288	0.283
	00:01:00	0.32	0.339	0.316	0.326	0.345	0.336
	00:02:00	0.371	0.397	0.368	0.377	0.402	0.39
	00:03:00	0.425	0.449	0.421	0.428	0.46	0.446
	00:04:00	0.479	0.503	0.477	0.483	0.521	0.504
	00:05:00	0.534	0.557	0.529	0.536	0.58	0.559
3	00:06:00	0.588	0.608	0.586	0.589	0.64	0.619
	00:07:00	0.645	0.668	0.641	0.646	0.703	0.679
	00:08:00	0.701	0.724	0.695	0.701	0.764	0.742
	00:09:00	0.76	0.782	0.753	0.756	0.826	0.81
	00:10:00	0.818	0.844	0.808	0.813	0.891	0.883
	TJ1060 D-10 adults
	[Total protein] in µg	17.6556	13.9889	12.5444	15.7556	15.7111	20.9333
	Kinetic read	#1	#2	#3	#4	#5	#6
	00:00:00	0.305	0.302	0.273	0.333	0.276	0.334
	00:01:00	0.346	0.358	0.309	0.387	0.314	0.376
	00:02:00	0.39	0.416	0.354	0.44	0.356	0.417
	00:03:00	0.439	0.472	0.398	0.493	0.4	0.461
	00:04:00	0.489	0.528	0.443	0.55	0.444	0.508
	00:05:00	0.538	0.588	0.487	0.608	0.488	0.558
	00:06:00	0.591	0.646	0.536	0.663	0.534	0.607
	00:07:00	0.641	0.706	0.58	0.722	0.58	0.653
	00:08:00	0.692	0.766	0.627	0.781	0.624	0.702
	00:09:00	0.746	0.828	0.676	0.841	0.672	0.754
	00:10:00	0.797	0.888	0.724	0.898	0.722	0.805
Fig 1D	Replicate #1	Treatment	adults	Alive	Dead	Total
		v. control	D-1	80	0	80
		10mM DEM	D-1	38	1	39
		v. control	D-4	92	1	93
		10mM DEM	D-4	54	64	118
		v. control	D-8	93	10	103
		10mM DEM	D-8	15	93	108
		v. control	D-10	67	7	74
		10mM DEM	D-10	7	70	77
	Replicate #2	Treatment	adults	Alive	Dead	Total
		v. control	D-1	90	0	90
		10mM DEM	D-1	71	3	74
		v. control	D-4	94	0	94
		10mM DEM	D-4	65	25	90
		v. control	D-8	75	4	79
		10mM DEM	D-8	7	79	86
		v. control	D-10	77	3	80
		10mM DEM	D-10	4	80	84
Fig 1E	Survival ± DEM ± Treatment
		Ctl					Lip-1					SIH
Replicate #1	DEM concentration	0	5	10	20		0	5	10	20		0	5	10	20
	N	30	29	35	26		61	56	54	51		67	77	65	54
24 hours	alive	30	27	26	0		61	44	35	8		67	76	63	44
	dead	0	2	9	26		0	12	19	43		0	1	2	10
Replicate #2	DEM concentration	0	5	10	20		0	5	10	20		0	5	10	20
	N	27	34	37	39		52	59	52	64		76	68	56	69
24 hours	alive	27	27	19	9		48	46	41	19		74	65	53	55
	dead	0	7	18	30		4	13	11	45		2	3	3	14
Replicate #3	DEM concentration	0		10	20		0		10	20		0		10	20
	N	26		31	33		40		39	33		50		34	43
24 hours	alive	22		11	0		40		33	8		50		33	40
	dead	4		20	33		0		6	25		0		1	3
Replicate #4	DEM concentration	0	5	10	20		0	5	10	20		0	5	10	20
	N	45	59	61	58		73	61	90	77		70	67	44	38
24 hours	alive	44	53	36	6		73	55	64	21		70	67	41	23
	dead	1	6	25	52		0	6	26	56		0	0	3	15
Combined Data	DEM concentration	0	5	10	20		0	5	10	20		0	5	10	20
	Dead	5	15	72	141		4	31	62	169		2	4	9	42
	Total	128	122	164	156		226	176	235	225		263	212	199	204
	Fraction Alive	0.960938	0.877049	0.560976	0.0961538		0.982301	0.823864	0.73617	0.248889		0.992395	0.981132	0.954774	0.794118
Fig 1F
Relative GSH versus DEM +/- Treatment
	Ctl	Lip-1	SIH	DEM	Lip-1 + DEM	SIH + DEM
	0.125	0.221846	0.268615	0.064	0.036	0.109
	0.144	0.159077	0.288308	0.052	0.045	0.114
	0.159692	0.157231	0.275385	0.032308	0.032	0.126
	0.230462	0.162769	0.275385	0.068615	0.061231	0.11
	0.178769			0.048923	0.055077	0.221846
				0.035385	0.059385	0.164615
					0.048923	0.152923
					0.063077	0.148
						0.175692

## Sheet: Relative GSH vs Age
Relative GSH versus Age
		Adult age in days	1	4	8	10
		Replicate samples	0.138	0.125	0.098	0.087
			0.136	0.103	0.101	0.106
			0.149	0.116	0.096	0.078
			0.14	0.12	0.097	0.102
			0.127	0.106	0.109	0.077
			0.15	0.105	0.109	0.082

## Sheet: GSH ± DEM ± Treatment
Relative GSH versus DEM +/- Treatment
	Ctl	Lip-1	SIH	DEM	Lip-1 + DEM	SIH + DEM
	0.125	0.221846	0.268615	0.064	0.036	0.109
	0.144	0.159077	0.288308	0.052	0.045	0.114
	0.159692	0.157231	0.275385	0.032308	0.032	0.126
	0.230462	0.162769	0.275385	0.068615	0.061231	0.11
	0.178769			0.048923	0.055077	0.221846
				0.035385	0.059385	0.164615
					0.048923	0.152923
					0.063077	0.148
						0.175692
