# Supplementary material for: Changes in ferrous iron and glutathione promote ferroptosis and frailty in aging Caenorhabditis elegans
Source: eLife. 2020 Jul 21;9:e56580. doi: 10.7554/eLife.56580 (PMC7373428; doi:10.7554/eLife.56580)
Supplement: Figure 2—source data 1. [file elife-56580-fig2-data1.xlsx]

## Sheet: PI
	#Animals with PI in somatic nuclei	#Total animals
8DO Ctl	19	119
8DO Lip-1	2	234
8DO SIH	3	308
6DO Ctl	13	160
6DO Lip-1	0	77
6DO SIH	0	81
Ctl	4	102
Lip-1	3	84
SIH	1	89
Ctl DEM	42	117
Lip- DEM	2	106
SIH DEM	1	129

## Sheet: Relative MDA vs Age
Relative MDA with Age
		Replicate Samples	1	2	3	4	5	6
Relative Fluorescence Units		Day 1 Adults Ctl	1736	1733	1795	1768	1768	1717
			1836	1799	1875	1862	1804	2059
			1623	1715	1624	1746	1626	1730
			1615	1691	1612	1707	1653	1807
		Day 8 Adults Ctl	2029	2056	2043	1970	1999	1962
			2054	2018	1949	2018	1986	2088
			1881	1870	1878	1863	1838	1799
			1894	2072	1920	1971	1905	2005
		Day 8 Adults + Lip-1	1696	1691	1739	1637	1690	1581
			1649	1771	1782	1784	1811	1760
			1699	1657	1601	1575	1589	1535
			1511	1543	1533	1589	1539	1650
		Day 8 Adults SIH	1721	1746	1646	1624	1699	1684
			1734	1652	1789	1718	1865	1792

## Sheet: Relative MDA ± DEM
Relative MDA +/- DEM
			Replicate Samples	Day 4 Adult Ctl	Day 4 Adult + 20 mM DEM 6h
Relative Fluorescence Units (RFU)				2022	2347
				2008	2539
				2017	2800
				1755.33	2467.67
				1789.67	2303.33
				1759.5	2502.5
				2022	2622.83
