# Supplementary material for: Changes in ferrous iron and glutathione promote ferroptosis and frailty in aging Caenorhabditis elegans
Source: eLife. 2020 Jul 21;9:e56580. doi: 10.7554/eLife.56580 (PMC7373428; doi:10.7554/eLife.56580)
Supplement: Figure 3—source data 1. [file elife-56580-fig3-data1.xlsx]

## Sheet: XFM - areal density
Untreated | Day 1
195.066
252.411
234.593
251.511
230.737
240.756
217.411
185.811
252.948
221.313
232.165
208.239
262.408
190.264
266.402
271.71
204.495
199.666
253.319
177.689
215.836
258.602
266.415
252.072
271.451
233.152
255.367
226.224
259.335
237.38
243.109
220.141
Untreated | Day 4
646.033
717.983
718.107
593.727
893.958
668.869
663.633
802.879
752.609
443.371
696.322
590.652
513.229
629.926
600.538
741.374
597.425
536.31
821.156
704.397
859.403
533.955
613.091
736.823
579.362
SIH | Day 4
387.616
282.543
341.379
357.305
316.176
301.747
321.309
302.702
297.726
277.705
412.104
367.237
304.358
298.271
295.591
338.652
300.929
312.426
360.586
302.537
376.602
301.387
283.553
305.06
374.276
303.003
267.065
Lip-1 | Day4
629.01
851.82
716.349
733.486
715.8
728.189
634.215
727.206
766.076
618.492
615.32
751.047
796.356
725.15
707.092
677.936
620.607
671.037
693.974
590.53
Untreated | Day 8
880.678
1099.7
629.578
803.997
765.296
1024
843.583
886.857
865.42
659.179
732.899
653.001
SIH | Day 8
408.869
384.214
516.077
557.968
553.868
487.724
452.441
544.981
455.884
379.508
397.399
433.624
386.614
375.512
335.671
395.419
324.2
Lip-1 | Day8
1143.1
831.775
889.272
804.892
741.439
931.739
644.021
713.165
796.159
836.096
660.163
860.071
679.998
760.091
840.842
736.843
901.611
1140.36
786.2
730.904
979.241
666.736

## Sheet: XFM - total iron
Untreated | Day 1	Untreated | Day 4	SIH | Day 4	Lip-1 | Day4	Untreated | Day 8	SIH | Day 8	Lip-1 | Day8
17.9311	142.76	98.9197	90.5171	139.381	130.173	177.468
25.1959	134.393	70.9857	129.542	177.873	118.67	99.9993
28.4094	153.686	69.9974	144.058	133.442	173.986	199.066
27.7443	169.61	80.5303	84.5163	214.246	196.13	109.424
27.9025	143.892	59.7406	109.828	122.779	202.012	172.417
27.8691	171.059	64.598	88.4966	155.694	138.414	157.283
25.2864	92.1016	67.5582	106.102	136.814	164.089	122.659
13.4771	134.781	69.822	111.029	153.249	184.931	187.696
25.0584	140.677	63.4419	93.802	139.891	164.929	126.147
24.4173	91.7275	63.738	89.8189	159.371	120.235	277.862
24.9297	103.024	84.6678	125.588	193.166	127.547	154.21
21.1065	105.108	85.46	101.465	127.236	116.392	131.408
32.6293	117.312	59.2334	118.116		123.41	158.443
17.6614	131.238	57.2947	126.1		103.968	244.1
26.8618	106.421	61.2806	129.394		92.0242	157.158
22.4978	106.198	71.7963	137.6		125.646	128.835
17.3074	113.31	74.4224	71.5138		74.1645	128.949
27.6195	119.986	66.8922	148.629			179.479
15.3933	130.339	93.2792	135.206			133.858
22.0602	136.475	61.9596	125.48			195.48
28.3643	111.984	69.1645				233.614
22.0668	135.537	63.3906				157.205
25.9397	112.263	54.522
23.7271	123.711	59.4345
25.4288	124.445	66.0954
27.1656		66.781
30.4015		41.0691
25.4973
26.1857
19.8078
39.6027
27.7497

## Sheet: SEC-ICP-MS 
10 DO control
Retention volume Vt (mL)	10-1C.csv	10-2C.csv	10-3C.csv
1.60017	24609	23277	16889
1.60901	23016.6	22826.3	14977
1.61785	25069.7	23116.8	16358.4
1.62669	23617.5	23587.5	14816.9
1.63553	23196.9	20242.9	16078.1
1.64437	23627.5	22505.9	15407.5
1.65321	23277	23116.8	15277.3
1.66205	25810.9	22285.6	15677.7
1.67089	22576	22816.3	15487.5
1.67973	23907.9	23857.9	15057.1
1.68857	24398.7	22015.2	16848.9
1.69741	24408.7	23717.7	16118.1
1.70625	23247	21033.9	15387.4
1.71509	23917.9	22946.5	15928
1.72393	24268.5	21254.2	15988
1.73277	22796.3	22385.7	15747.8
1.74161	23607.5	22766.3	14306.4
1.75045	23317.1	21965.1	15757.8
1.75929	22966.5	23026.6	16969
1.76813	23617.5	22235.5	15747.8
1.77697	23176.8	23487.3	16708.8
1.78581	23317.1	22706.2	15097.1
1.79465	23066.7	23116.8	15787.8
1.80349	24078.2	22535.9	16899
1.81233	22916.5	23186.9	17599.7
1.82117	24739.2	22896.4	16178.2
1.83001	24779.3	24849.4	17109.2
1.83885	25059.7	25720.8	18520.8
1.8477	25830.9	24619	19081.4
1.85654	25530.5	27193.2	18961.3
1.86538	25189.9	28074.7	20182.8
1.87422	26702.4	27613.9	21955.1
1.88306	25290.1	30459.1	24148.3
1.8919	27804.2	29477.2	23257
1.90074	28104.8	31421	23978
1.90958	28886.2	32853.8	25380.2
1.91842	30689.5	35619.8	28104.8
1.92726	31982.1	36922.8	27864.3
1.9361	32934	37333.7	30759.7
1.94494	33705.6	40772.1	32122.4
1.95378	38225.8	42506.7	35689.9
1.96262	41604.3	46267.1	36511.8
1.97146	46196.9	53238.8	41273.4
1.9803	50499.9	52546.6	47109.6
1.98914	60946.4	69451.1	53891
1.99798	64701.2	74041.7	59601.3
2.00682	78000.5	83387.7	69742.4
2.01567	82704.2	87288.5	75930.6
2.02451	93916.1	92346.9	78643.7
2.03335	98091.1	100768	80804.5
2.04219	94751	103968	84372.9
2.05103	89520.9	100979	80472.8
2.05987	88485.1	93342.7	79799.4
2.06871	82854.9	90727.7	73438.9
2.07755	76955.5	83830	68376.5
2.08639	76513.3	77226.8	60223.7
2.09523	65835.8	71078.2	55667.1
2.10407	59882.4	64620.8	52697
2.11291	57122.2	64299.5	45916.1
2.12175	52526.5	53911.1	44772.8
2.13059	47229.9	50620.3	37624.4
2.13943	45986.3	44963.4	37704.6
2.14827	42757.3	45675.4	35058.5
2.15711	42847.6	43288.8	34497.3
2.16595	38215.8	41092.9	32593.3
2.17479	39498.9	39298.4	30629.4
2.18363	36531.8	40000.2	29717.7
2.19247	37203.4	38606.7	30068.3
2.20131	36832.5	39539	27413.6
2.21015	37834.9	38095.5	29276.9
2.21899	36471.7	35950.5	29507.3
2.22783	37634.4	37113.2	28755.9
2.23667	35178.8	37213.4	28184.9
2.24551	33505.2	35800.2	27253.3
2.25435	34607.6	35058.5	27724.1
2.26319	36982.9	35740.1	26672.3
2.27203	34697.8	35950.5	28174.9
2.28087	37323.7	34888.2	27153.1
2.28971	34276.8	36000.6	27053
2.29855	36120.9	34717.8	26261.6
2.30739	34677.7	35429.4	26441.9
2.31623	35529.6	35459.4	26201.5
2.32507	34647.6	36371.5	27854.3
2.33391	35669.9	36371.5	27103
2.34275	35990.6	37073.1	27363.5
2.3516	34387.1	36171	26752.5
2.36044	36602	36511.8	29016.4
2.36928	37073.1	35469.4	27734.1
2.37812	36040.7	35489.5	28044.7
2.38696	35238.9	38937.5	26972.8
2.3958	36221.1	37002.9	29136.6
2.40464	38917.5	38235.8	29647.6
2.41348	36331.4	37544.2	29858
2.42232	38155.7	39007.7	30258.7
2.43116	37844.9	37444	35339.2
2.44	40631.8	40070.3	36100.9
2.44884	40862.3	41343.6	36942.8
2.45768	41353.6	43318.8	37694.6
2.46652	41203.2	42927.8	42446.5
2.47536	46437.6	47611.1	40321
2.4842	47961.9	49436.6	44522.1
2.49304	51252.3	54262.3	51242.3
2.50188	61568.8	65695.2	63395.9
2.51072	74393.3	79266.8	73318.4
2.51957	92890.1	92678.9	95666.4
2.52841	106918	122278	111207
2.53725	138691	143120	146844
2.54609	180062	187801	191859
2.55493	215883	228315	247183
2.56377	261601	278799	281099
2.57261	310956	322043	330075
2.58145	348583	381536	407169
2.59029	372833	421371	431959
2.59913	438371	444693	495036
2.60797	445063	482726	527927
2.61681	477688	519600	561227
2.62565	477111	529859	553949
2.63449	489385	505868	577545
2.64333	500998	559311	581899
2.65217	457138	512247	561496
2.66101	418897	460019	494912
2.66985	413560	448250	474669
2.67869	369947	391626	431641
2.68753	330606	366253	382468
2.69637	293826	323696	330728
2.70521	259375	293938	300203
2.71405	236056	247742	259060
2.72289	203340	215336	234159
2.73173	172651	197132	195513
2.74057	157616	160202	167920
2.74941	134566	144038	146501
2.75825	125744	127690	128496
2.76709	110854	114420	116162
2.77593	98252.1	107320	106314
2.78477	87550	91160.1	89349.9
2.79361	82975.6	84191.9	89279.5
2.80245	77076.1	82141.3	78533.1
2.81129	71249	78673.8	77598.6
2.82013	68898.7	70134.1	67593.1
2.82897	68928.8	73408.8	67111.1
2.83781	68818.4	63345.7	62472.3
2.84665	59842.2	62321.7	61649.1
2.8555	60263.8	59450.8	62833.7
2.86434	57734.4	58708	55125.2
2.87318	54884.4	57333	54372.7
2.88202	54182	54071.6	53028.1
2.89086	51312.5	54332.5	51242.3
2.8997	49617.2	49878	49135.7
2.90854	49657.3	49436.6	47791.6
2.91738	48062.4	52235.5	45214.1
2.92622	45685.4	46929	48112.6
2.93506	47300.1	47390.4	44532.2
2.9439	45545	45234.1	40892.4
2.95274	45244.2	44141.1	42667.1
2.96158	47611.1	45123.8	43118.3
2.97042	44291.5	45765.7	40812.2
2.97926	43950.6	41363.6	41313.5
2.9881	44833	42937.8	40812.2
2.99694	44592.3	43479.3	39218.2
3.00578	42326.2	42075.5	39508.9
3.01462	43429.1	39689.4	36211.1
3.02347	43800.2	42326.2	42486.6
3.03231	41143.1	43429.1	40310.9
3.04115	45174	42496.6	39168.1
3.04999	41544.1	40732	36632.1
3.05883	44271.4	44000.7	39258.3
3.06767	45394.6	42857.6	37764.7
3.07651	42637	41393.7	38286
3.08535	40110.4	40310.9	39138
3.09419	45545	42546.8	40321
3.10303	42516.7	43008	39759.6
3.11187	45745.6	42276	42576.8
3.12071	43018	43519.4	39889.9
3.12955	45765.7	42977.9	39759.6
3.13839	44301.5	43519.4	38536.6
3.14723	45123.8	45153.9	42987.9
3.15607	46086.6	46708.4	43248.6
3.16491	50249.1	49567	47370.3
3.17375	50128.8	52727.1	47611.1
3.18259	55125.2	53309.1	55867.8
3.19143	58477.2	56088.6	53660.2
3.20027	61829.8	57463.5	58627.7
3.20911	61598.9	64841.7	65142.9
3.21795	60765.7	67663.4	62141
3.22679	61890	69230.1	65464.3
3.23563	65936.2	65805.7	63867.8
3.24447	63938.1	63636.9	62030.6
3.25331	59209.8	62301.6	55897.9
3.26215	58276.4	61759.5	59982.7
3.27099	59731.8	56750.9	56249.2
3.27983	57282.8	54553.3	52937.8
3.28867	50469.8	53078.3	48844.8
3.29751	53640.2	51864.3	51543.3
3.30635	50108.7	48012.3	47651.2
3.31519	47831.7	48122.6	45845.9
3.32403	47009.3	45765.7	41684.5
3.33287	42947.8	44000.7	42466.5
3.34171	44271.4	42707.2	37484.1
3.35055	42456.5	40782.2	41774.7
3.35939	42917.8	41253.4	40411.2
3.36824	39709.4	41784.7	41383.7
3.37708	42406.4	38977.6	40280.9
3.38592	42827.5	40310.9	41203.2
3.39476	42466.5	41554.1	39899.9
3.4036	42015.3	40481.4	40481.4
3.41244	43308.8	45184	40310.9
3.42128	46628.2	45865.9	43399.1
3.43012	47540.8	44883.2	44802.9
3.43896	47641.2	45113.8	46217
3.4478	47250	48664.2	48343.3
3.45664	47811.7	48022.3	47209.9
3.46548	47280.1	46166.8	46708.4
3.47432	49015.3	47651.2	47129.6
3.48316	46888.9	46487.7	50981.5
3.492	44702.6	45464.8	46056.5
3.50084	42947.8	44532.2	43860.3
3.50968	43168.4	44441.9	47270.1
3.51852	41584.2	41844.9	41494
3.52736	44391.8	40591.7	40681.9
3.53621	40782.2	42476.6	42877.6
3.54505	42536.7	40461.3	38105.5
3.55389	40411.2	39940	39118
3.56273	42366.3	38867.4	37844.9
3.57157	39819.7	39047.8	37544.2
3.58041	37714.6	39749.5	34787.9
3.58925	40401.2	38787.2	35790.2
3.59809	38927.5	36782.4	37073.1
3.60693	38737.1	36010.7	32703.5
3.61577	35028.5	36291.3	34527.4
3.62461	37524.2	34767.9	32833.8
3.63345	34597.5	35339.2	35218.9
3.64229	36862.6	32252.6	29707.7
3.65113	36291.3	34427.2	32853.8
3.65997	33705.6	33405	33344.9
3.66881	34567.5	31471.1	30098.4
3.67765	33755.7	34848.1	32663.5
3.68649	33825.9	35379.2	33475.1
3.69533	36802.5	36792.4	36752.4
3.70417	37143.3	38426.3	38245.9
3.71301	40040.3	40421.2	42095.6
3.72185	42827.5	44903.2	45605.2
3.73069	46798.7	45174	46979.2
3.73953	51172.1	50700.6	50951.4
3.74837	52897.7	51974.7	53941.2
3.75721	53208.7	54874.4	61217.4
3.76605	52085	55205.5	61890
3.77489	54683.7	56871.3	59470.8
3.78373	54081.7	59099.4	60404.3
3.79257	54894.4	56941.6	61890
3.80141	58487.2	58366.8	57784.6
3.81025	56700.8	55958.1	61287.7
3.81909	56650.6	55105.2	59250
3.82793	69521.4	65032.5	68306.2
3.83677	88414.7	76091.3	74132.1
3.84561	124726	110653	93041
3.85445	173904	153001	124878
3.86329	239426	204788	159707
3.87214	282727	238076	211657
3.88098	327309	274129	232048
3.88982	325186	277242	229167
3.89866	308703	258765	242248
3.9075	293031	254274	222919
3.91634	253664	216714	178383
3.92518	227554	189207	167233
3.93402	193782	156000	151336
3.94286	154496	138227	112476
3.9517	128789	107955	96028.6
3.96054	110240	90707.6	80472.8
3.96938	95133.3	75187.1	75347.8
3.97822	78834.6	68336.3	59681.6
3.98706	65163	57363.1	53068.3
3.9959	60123.3	50620.3	46959.1
4.00474	55336	44351.7	42627
4.01358	50199	42667.1	35569.7
4.02242	48112.6	39328.5	34828
4.03126	44060.9	38035.4	37895
4.04011	44030.8	36040.7	34226.7
4.04895	41313.5	33505.2	28375.2
4.05779	40772.1	34326.9	30298.8
4.06663	34276.8	35078.6	29066.5
4.07547	35008.4	31070.3	27403.6
4.08431	34868.1	32583.3	25199.9
4.09315	34938.3	34838.1	27553.8
4.10199	32132.4	33505.2	27243.3
4.11083	33204.6	30699.6	25420.3
4.11967	32743.6	31030.2	24118.2
4.12851	32092.3	30819.8	22525.9
4.13735	30789.7	31350.8	22205.5
4.14619	31130.4	32433	24178.3
4.15503	29567.4	29026.4	23457.3
4.16387	29246.8	31030.2	24879.4
4.17271	30118.5	29687.6	25530.5
4.18155	30178.6	29407.1	23857.9
4.19039	28495.5	29727.7	25600.6
4.19923	29837.9	28946.3	22866.4
4.20807	28435.4	29637.5	21464.5
4.21691	28255	27323.4	23887.9
4.22575	27744.2	27874.4	21394.4
4.23459	26882.7	26632.2	22225.5
4.24343	25220	26031.2	19582
4.25227	25039.7	25630.6	21394.4
4.26111	24949.5	24699.1	19391.8
4.26995	24348.6	22726.2	20363
4.27879	24098.2	23507.3	19181.5
10 DO SIH
Retention volume Vt (mL)	10-1SIH.csv	10-2SIH.csv	10-3SIH.csv
1.60017	25690.7	20733.5	20713.5
1.60901	27253.3	19772.3	20022.6
1.61785	28695.8	20152.7	20453.1
1.62669	26572.2	21144	22165.4
1.63553	26421.9	20282.9	21013.8
1.64437	26612.2	21144	20883.7
1.65321	26612.2	19461.9	18791.1
1.66205	25901	21144	20443.1
1.67089	26642.3	20202.8	19952.5
1.67973	28725.9	20162.8	19832.3
1.68857	28385.3	20563.3	19211.6
1.69741	25680.7	20593.3	19562
1.70625	25680.7	21634.7	20222.8
1.71509	25820.9	20152.7	20012.6
1.72393	25540.5	21244.2	19532
1.73277	28004.6	19632.1	23627.5
1.74161	27022.9	20593.3	19652.1
1.75045	26281.7	20152.7	21714.8
1.75929	26211.5	21003.8	20162.8
1.76813	25991.2	19622.1	20473.2
1.77697	28635.7	19732.2	20663.4
1.78581	29266.9	20723.5	20252.9
1.79465	26071.3	20813.6	20503.2
1.80349	27744.2	20743.5	19782.3
1.81233	27483.7	20693.4	20563.3
1.82117	25770.8	20182.8	20823.6
1.83001	25810.9	20883.7	18741
1.83885	27714.1	20783.5	20052.6
1.8477	27573.8	19221.6	21674.7
1.85654	27343.5	20042.6	19562
1.86538	27654	21634.7	24819.3
1.87422	28415.3	22295.6	21995.2
1.88306	26582.2	20863.7	21664.7
1.8919	27523.8	22135.4	23577.4
1.90074	29687.6	23076.7	22786.3
1.90958	29056.5	23216.9	26431.9
1.91842	28495.5	24899.5	26652.3
1.92726	29106.6	25460.3	29266.9
1.9361	31541.2	24839.3	33214.6
1.94494	32413	28405.3	29256.8
1.95378	35489.5	30859.9	37113.2
1.96262	34818	34918.2	40651.8
1.97146	38135.6	38897.4	45775.7
1.9803	44301.5	47300.1	55095.1
1.98914	46517.8	54262.3	64861.8
1.99798	52225.5	64159	72082.8
2.00682	61990.4	72474.5	85398.3
2.01567	67763.9	83990.9	115940
2.02451	70485.6	91230.6	107502
2.03335	78794.4	99258.3	111217
2.04219	79106	103978	140497
2.05103	84252.2	103556	137652
2.05987	84754.9	96903.9	129192
2.06871	78211.6	95425	136371
2.07755	77096.1	87771.2	115467
2.08639	70927.6	82432.8	100657
2.09523	66026.6	74945.9	98755.2
2.10407	58145.9	65986.4	85720.1
2.11291	54573.3	60856	80623.5
2.12175	54733.9	54292.4	80121
2.13059	47390.4	51061.7	63566.6
2.13943	47811.7	48674.3	66116.9
2.14827	44181.2	43509.3	48784.6
2.15711	44090.9	40952.6	48764.5
2.16595	42145.7	37714.6	48624.1
2.17479	41363.6	36892.7	44863.1
2.18363	40992.7	35249	42015.3
2.19247	40240.8	33485.2	41905.1
2.20131	38175.7	36521.8	42035.4
2.21015	39879.9	33344.9	40561.6
2.21899	40922.5	33966.2	42757.3
2.22783	36922.8	32853.8	36852.6
2.23667	36742.3	33845.9	41123
2.24551	38095.5	32242.6	41494
2.25435	38456.4	33284.7	41233.3
2.26319	38406.2	32473.1	36271.2
2.27203	37594.3	32332.8	37093.2
2.28087	35269	31701.5	38707
2.28971	38215.8	31871.9	34296.9
2.29855	35880.4	32723.6	36090.8
2.30739	37153.3	32212.5	36251.2
2.31623	40020.2	32663.5	38596.7
2.32507	37093.2	31631.4	35900.4
2.33391	38015.3	30839.8	36812.5
2.34275	37554.2	30308.8	35148.7
2.3516	37794.8	32984.1	38717
2.36044	37423.9	32192.5	34637.6
2.36928	39057.8	33445.1	36782.4
2.37812	38296	31410.9	36221.1
2.38696	39478.9	31952	36361.5
2.3958	39107.9	32292.7	38867.4
2.40464	37985.2	31781.7	37654.5
2.41348	39398.7	32984.1	38005.3
2.42232	40732	33555.3	40170.6
2.43116	41163.1	34727.8	40050.3
2.44	43088.2	34888.2	37143.3
2.44884	46217	38436.3	42977.9
2.45768	45153.9	40130.5	43278.7
2.46652	47129.6	37203.4	52636.8
2.47536	47530.8	43148.4	51623.5
2.4842	50911.2	41905.1	57433.4
2.49304	53188.7	47240	60163.4
2.50188	56750.9	51894.4	62201.2
2.51072	64691.1	59842.2	69672.1
2.51957	80472.8	68828.4	76292.3
2.52841	83005.7	78693.9	103475
2.53725	107280	94308.4	105247
2.54609	126430	105287	125886
2.55493	141869	124293	147167
2.56377	162252	149741	179880
2.57261	192486	181003	202256
2.58145	220729	193478	216714
2.59029	232008	217667	265128
2.59913	267955	231429	296616
2.60797	280763	246442	311762
2.61681	290159	255412	293479
2.62565	290597	273091	313709
2.63449	298104	267325	334557
2.64333	288377	267762	311180
2.65217	289620	254751	290017
2.66101	256773	247742	264813
2.66985	247874	219310	280386
2.67869	228984	198540	233296
2.68753	209955	184644	208780
2.69637	190098	169164	214860
2.70521	176948	147187	187275
2.71405	150841	138842	170670
2.72289	139589	120565	140729
2.73173	125069	105086	125664
2.74057	115719	99117.5	120393
2.74941	113100	94217.9	105750
2.75825	98472.5	81558.3	100184
2.76709	87027.1	71439.9	86735.5
2.77593	84000.9	69953.3	80794.4
2.78477	77689	61428.2	69250.2
2.79361	75769.8	62161.1	76101.4
2.80245	73549.4	54473	68707.9
2.81129	69059.4	53339.2	60193.5
2.82013	68868.6	51453	65373.9
2.82897	68336.3	48724.4	61448.3
2.83781	63466.2	46868.9	57122.2
2.84665	59149.6	44712.7	54463
2.8555	60073.1	44040.8	47149.7
2.86434	58015.5	41203.2	48965.2
2.87318	54753.9	40491.4	51212.2
2.88202	51252.3	39679.4	43810.2
2.89086	54272.3	38526.5	48584
2.8997	50620.3	37283.6	44401.8
2.90854	49205.9	34988.4	42496.6
2.91738	46126.7	34457.2	45625.2
2.92622	44492.1	33745.7	43960.6
2.93506	45013.5	32783.7	38306
2.9439	46658.2	35579.7	37614.4
2.95274	41774.7	35249	42296.1
2.96158	44070.9	33555.3	39178.1
2.97042	44532.2	34757.9	39689.4
2.97926	46106.6	32944	39869.8
2.9881	46277.1	35118.7	40341
2.99694	44391.8	32132.4	35990.6
3.00578	42967.9	33144.4	37514.1
3.01462	45966.2	34417.2	36411.6
3.02347	43890.4	32934	36481.7
3.03231	42647	33154.5	36120.9
3.04115	45404.6	33024.2	39328.5
3.04999	47901.9	33074.3	41393.7
3.05883	44652.5	32503.1	41103
3.06767	47771.5	34838.1	42105.6
3.07651	48834.8	34136.5	36892.7
3.08535	46267.1	35499.5	38616.8
3.09419	46377.4	35018.5	41052.8
3.10303	47280.1	33455.1	38005.3
3.11187	45334.4	35128.7	40722
3.12071	45494.9	35609.8	41413.8
3.12955	46648.2	34276.8	38847.3
3.13839	45174	34868.1	41644.4
3.14723	48293.1	35840.3	42145.7
3.15607	51182.1	39148.1	45394.4
3.16491	54683.7	38316	42998
3.17375	53600	38366.2	46427.6
3.18259	59350.4	42546.8	51623.5
3.19143	61187.3	44782.9	51322.6
3.20027	66518.6	47340.2	56550.2
3.20911	63255.4	48002.2	57523.7
3.21795	63044.5	51412.8	61337.9
3.22679	67372.2	48152.7	63094.7
3.23563	68788.2	51733.9	56710.8
3.24447	65032.5	49637.2	61970.3
3.25331	63416	49978.3	59691.7
3.26215	61890	48884.9	61498.5
3.27099	62723.3	47731.4	59581.2
3.27983	58497.2	46588	52516.4
3.28867	55918	44351.7	56329.4
3.29751	54794.1	44612.4	51874.3
3.30635	56961.7	40561.6	50128.8
3.31519	54402.8	39408.7	49075.5
3.32403	51984.7	36632.1	46878.9
3.33287	51974.7	36952.8	42807.4
3.34171	50720.6	34497.3	41744.6
3.35055	46427.6	34968.3	40391.2
3.35939	48533.8	34447.2	42406.4
3.36824	48764.5	35319.1	38235.8
3.37708	51152	34326.9	43519.4
3.38592	47560.9	37353.8	40391.2
3.39476	48834.8	37113.2	36992.9
3.4036	47711.4	38827.3	40200.7
3.41244	51041.7	36431.6	40150.6
3.42128	54081.7	38807.2	49827.8
3.43012	53088.3	38255.9	44020.8
3.43896	52957.9	41965.2	43469.2
3.4478	53218.8	41624.3	45344.5
3.45664	54262.3	40431.2	45615.2
3.46548	53620.1	38757.1	42426.4
3.47432	54573.3	41925.1	40511.5
3.48316	50620.3	38526.5	41042.8
3.492	54222.1	40491.4	46317.2
3.50084	51844.2	37634.4	41844.9
3.50968	48463.6	38286	46116.7
3.51852	48263	35810.2	40230.8
3.52736	47771.5	35519.6	42536.7
3.53621	46297.2	34948.3	43108.3
3.54505	43258.7	34337	38616.8
3.55389	43790.1	31861.8	36070.8
3.56273	44642.5	33435.1	40050.3
3.57157	47390.4	33595.4	39097.9
3.58041	42657.1	31531.2	39388.7
3.58925	43740	32603.3	38847.3
3.59809	40812.2	30899.9	39007.7
3.60693	42366.3	32974.1	38566.6
3.61577	40230.8	31370.9	33144.4
3.62461	40220.7	29347	33244.7
3.63345	38486.4	29076.5	34136.5
3.64229	37945.2	28455.4	38737.1
3.65113	37995.3	29236.8	31851.8
3.65997	36261.2	29417.1	35409.3
3.66881	39208.2	28074.7	31911.9
3.67765	39158.1	29647.6	32503.1
3.68649	38566.6	31300.7	33084.3
3.69533	39589.1	29817.9	34507.3
3.70417	44281.5	33515.2	37403.9
3.71301	45926.1	33304.8	38717
3.72185	48212.9	39508.9	44612.4
3.73069	52476.3	40531.5	48263
3.73953	56590.4	41483.9	50128.8
3.74837	57995.4	45434.7	49837.8
3.75721	62090.8	45525	52666.9
3.76605	64399.9	45765.7	61307.8
3.77489	60113.2	46618.1	57473.5
3.78373	61408.2	43499.3	54172
3.79257	57363.1	43990.7	50499.9
3.80141	59390.5	43078.2	49978.3
3.81025	58015.5	44833	47440.6
3.81909	61127.1	43108.3	45204.1
3.82793	61659.1	46457.7	49015.3
3.83677	65765.5	50349.5	49787.7
3.84561	83076.1	62803.6	65153
3.85445	123144	88012.5	76412.9
3.86329	143635	107109	101382
3.87214	182692	141859	122660
3.88098	195381	154587	151204
3.88982	212346	164940	157646
3.89866	211860	165273	164202
3.9075	219198	163808	154102
3.91634	171953	144180	138621
3.92518	153718	120041	142616
3.93402	133850	108458	104673
3.94286	119658	95374.7	92326.8
3.9517	101261	78241.7	76744.5
3.96054	88796.8	65263.4	67161.3
3.96938	72996.9	58376.8	57473.5
3.97822	63215.2	49466.7	54262.3
3.98706	59882.4	45344.5	43399.1
3.9959	52737.2	42516.7	43218.6
4.00474	47139.7	39148.1	38676.9
4.01358	42757.3	35309.1	36962.8
4.02242	43429.1	34256.8	30549.3
4.03126	40651.8	31911.9	32914
4.04011	42075.5	29276.9	31841.8
4.04895	40541.5	27834.3	31791.7
4.05779	40130.5	26862.6	29096.5
4.06663	38426.3	26452	26101.4
4.07547	37614.4	26241.6	26652.3
4.08431	38376.2	26482	26862.6
4.09315	35960.6	26411.9	27523.8
4.10199	34918.2	26522.1	26321.7
4.11083	34747.9	23938	23226.9
4.11967	34357	23307	23787.8
4.12851	34717.8	25049.7	21925.1
4.13735	36612	24809.3	22886.4
4.14619	35499.5	24358.6	23807.8
4.15503	34367	23417.2	22736.2
4.16387	32934	23196.9	22746.2
4.17271	32833.8	21644.7	22996.6
4.18155	33234.6	22606	23777.7
4.19039	32282.7	23066.7	20733.5
4.19923	32753.6	20533.2	22075.3
4.20807	32593.3	22355.7	21374.3
4.21691	32052.2	21154	20723.5
4.22575	30549.3	20943.8	21955.1
4.23459	30749.7	21524.5	20993.8
4.24343	29868	21985.2	20953.8
4.25227	27684	20623.3	20743.5
4.26111	28345.2	19351.8	16618.7
4.26995	27954.5	17789.9	16989.1
