# Supplementary material for: Changes in ferrous iron and glutathione promote ferroptosis and frailty in aging Caenorhabditis elegans
Source: eLife. 2020 Jul 21;9:e56580. doi: 10.7554/eLife.56580 (PMC7373428; doi:10.7554/eLife.56580)
Supplement: Figure 4—source data 1. [file elife-56580-fig4-data1.xlsx]

## Sheet: XANES
D1					D8 control					D8 SIH					D8 Lip-1					N2 D4					N2 D4 +DEM
Energy (eV)	d1_ave	plus 95% CI	minus 95% CI		Energy (eV)	d8_ave	plus 95% CI	minus 95% CI		Energy (eV)	d8_ave	plus 95% CI	minus 95% CI		Energy (eV)	d8_ave	plus 95% CI	minus 95% CI		Energy (eV)	d4_ave	plus 95% CI	minus 95% CI		Energy (eV)	d4_ave	plus 95% CI	minus 95% CI
7168.4	0.93502	0.9109	0.95913		7167	0.876	0.88136	0.87128		7168	0.86882	0.88027	0.85736		7165	0.837	0.871	0.803		7166	0.781715	0.769238	0.794192		7165.5	0.895387	0.811849	0.978925
7166.4	0.92307	0.90296	0.94318		7165	0.842	0.84431	0.83992		7166	0.8481	0.85077	0.84542		7163	0.794	0.821	0.768		7164	0.771199	0.762433	0.779965		7163.5	0.863453	0.854677	0.87223
7164.4	0.89827	0.88492	0.91161		7163	0.821	0.83312	0.8089		7164	0.82261	0.83478	0.81044		7161	0.792	0.819	0.765		7162	0.754424	0.744208	0.76464		7161.5	0.838543	0.828781	0.848305
7162.4	0.87663	0.85249	0.90076		7161	0.803	0.80925	0.79596		7162	0.81063	0.82241	0.79885		7159	0.783	0.803	0.763		7160	0.74212	0.728509	0.755731		7159.5	0.81794	0.793858	0.842022
7160.4	0.86306	0.84195	0.88417		7159	0.789	0.80752	0.77104		7160	0.79985	0.80502	0.79467		7157	0.792	0.797	0.787		7158	0.74258	0.720438	0.764723		7157.5	0.800816	0.776243	0.825389
7158.4	0.88143	0.85103	0.91183		7157	0.803	0.81489	0.79104		7158	0.80367	0.80859	0.79874		7155	0.81	0.834	0.786		7156	0.760743	0.752242	0.769243		7155.5	0.807097	0.784791	0.829402
7156.4	0.89222	0.86468	0.91976		7155	0.825	0.83725	0.8119		7156	0.81469	0.82438	0.805		7153	0.858	0.875	0.841		7154	0.798148	0.775159	0.821138		7153.5	0.802102	0.759724	0.84448
7154.4	0.92817	0.90192	0.95441		7153	0.857	0.86245	0.85141		7154	0.86575	0.8747	0.8568		7151	0.905	0.92	0.89		7152	0.811967	0.771763	0.852172		7151.5	0.831979	0.795049	0.868908
7152.4	0.95657	0.9203	0.99283		7151	0.903	0.91668	0.8887		7152	0.90403	0.90621	0.90185		7149	0.943	0.951	0.936		7150	0.87022	0.849523	0.890917		7149.5	0.860335	0.808631	0.91204
7150.4	0.9937	0.9786	1.0088		7149	0.944	0.95471	0.93318		7150	0.94193	0.9488	0.93506		7147	0.973	0.993	0.952		7148	0.89856	0.874637	0.922483		7147.5	0.910025	0.873978	0.946073
7148.4	1.03624	1.02494	1.04754		7147	0.98	0.99693	0.96369		7148	0.96916	0.99901	0.93931		7145	1.01	1.055	0.966		7146	0.924007	0.895247	0.952768		7145.5	0.941208	0.888762	0.993653
7146.4	1.0515	1.02179	1.08122		7145	1.018	1.03025	1.00576		7146	1.00251	1.01432	0.99069		7143	1.06	1.097	1.032		7144	0.957698	0.937073	0.978323		7143.5	0.982652	0.927117	1.03819
7144.4	1.09261	1.05602	1.12921		7143	1.054	1.06782	1.03973		7144	1.03648	1.05387	1.01909		7141	1.11	1.144	1.076		7142	1.00155	0.989493	1.01361		7141.5	1.01213	0.947327	1.07694
7142.4	1.13703	1.09108	1.18299		7141	1.115	1.12635	1.10305		7142	1.08147	1.08919	1.07375		7139	1.19	1.228	1.147		7140	1.04386	1.02055	1.06717		7139.5	1.05125	0.99153	1.11098
7140.4	1.18697	1.16111	1.21284		7139	1.188	1.20422	1.17243		7140	1.15334	1.20074	1.10594		7137	1.23	1.277	1.18		7138	1.09999	1.07497	1.12501		7137.5	1.11218	1.03426	1.19009
7138.4	1.22766	1.17969	1.27563		7137	1.238	1.26114	1.21443		7138	1.20626	1.22119	1.19132		7136.6	1.22	1.292	1.151		7137.5	1.11102	1.08098	1.14106		7137.1	1.16969	1.10437	1.23502
7138	1.24467	1.22004	1.26931		7136.6	1.247	1.2604	1.23309		7137.6	1.21441	1.24227	1.18654		7136.2	1.25	1.302	1.205		7137	1.11717	1.09616	1.13818		7136.7	1.20578	1.15736	1.2542
7137.6	1.25675	1.20463	1.30887		7136.2	1.25	1.26666	1.23308		7137.2	1.21737	1.24248	1.19227		7135.8	1.26	1.297	1.225		7136.5	1.1251	1.08592	1.16429		7136.3	1.21841	1.16667	1.27015
7137.2	1.23876	1.21614	1.26137		7135.8	1.257	1.26949	1.2444		7136.8	1.219	1.24522	1.19279		7135.4	1.27	1.304	1.229		7136	1.12915	1.10205	1.15625		7135.9	1.22501	1.18193	1.26809
7136.8	1.2579	1.24093	1.27486		7135.4	1.26	1.27923	1.24056		7136.4	1.21031	1.22017	1.20045		7135	1.27	1.296	1.253		7135.5	1.14365	1.11277	1.17453		7135.5	1.2246	1.19067	1.25853
7136.4	1.26077	1.22491	1.29662		7135	1.275	1.29782	1.25178		7136	1.24205	1.26557	1.21853		7134.6	1.29	1.312	1.268		7135	1.1482	1.12135	1.17505		7135.1	1.22672	1.19155	1.2619
7136	1.29586	1.26729	1.32443		7134.6	1.289	1.31894	1.25857		7135.6	1.24272	1.25751	1.22793		7134.2	1.29	1.342	1.241		7134.5	1.1538	1.13025	1.17736		7134.7	1.23786	1.20567	1.27004
7135.6	1.2578	1.23126	1.28434		7134.2	1.268	1.29607	1.24067		7135.2	1.24161	1.25421	1.229		7133.8	1.31	1.345	1.282		7134	1.16414	1.12707	1.20122		7134.3	1.25011	1.21988	1.28034
7135.2	1.29252	1.25474	1.3303		7133.8	1.282	1.30063	1.2626		7134.8	1.23801	1.25375	1.22227		7133.4	1.32	1.332	1.314		7133.5	1.16652	1.13704	1.196		7133.9	1.2467	1.19675	1.29665
7134.8	1.29622	1.26403	1.32841		7133.4	1.299	1.31908	1.27937		7134.4	1.25094	1.26842	1.23347		7133	1.32	1.351	1.286		7133	1.17799	1.14804	1.20794		7133.5	1.25543	1.21511	1.29575
7134.4	1.30015	1.27328	1.32702		7133	1.305	1.31394	1.29598		7134	1.27016	1.28249	1.25782		7132.6	1.33	1.37	1.3		7132.5	1.18216	1.1498	1.21453		7133.1	1.26152	1.23901	1.28403
7134	1.30708	1.27011	1.34405		7132.6	1.314	1.3324	1.29512		7133.6	1.27029	1.28015	1.26043		7132.2	1.34	1.397	1.279		7132	1.18503	1.15232	1.21773		7132.7	1.26667	1.2367	1.29664
7133.6	1.29595	1.27547	1.31643		7132.2	1.315	1.34354	1.28619		7133.2	1.28918	1.29901	1.27936		7131.8	1.33	1.36	1.298		7131.5	1.17967	1.15105	1.2083		7132.3	1.28335	1.25571	1.311
7133.2	1.30793	1.28851	1.32735		7131.8	1.326	1.34943	1.30303		7132.8	1.28645	1.30969	1.2632		7131.4	1.37	1.387	1.36		7131	1.17565	1.13785	1.21346		7131.9	1.28285	1.25984	1.30585
7132.8	1.32502	1.31482	1.33522		7131.4	1.331	1.357	1.30465		7132.4	1.29394	1.30049	1.28739		7131	1.34	1.37	1.317		7130.5	1.16024	1.13682	1.18366		7131.5	1.2838	1.25314	1.31446
7132.4	1.33161	1.29632	1.3669		7131	1.331	1.35783	1.30346		7132	1.28995	1.30345	1.27644		7130.6	1.36	1.371	1.342		7130	1.14134	1.11444	1.16824		7131.1	1.27704	1.25642	1.29765
7132	1.31237	1.28457	1.34017		7130.6	1.336	1.35418	1.31692		7131.6	1.27603	1.28681	1.26526		7130.2	1.33	1.365	1.294		7129.5	1.12505	1.10185	1.14825		7130.7	1.27619	1.25925	1.29312
7131.6	1.30789	1.27975	1.33604		7130.2	1.327	1.34316	1.31018		7131.2	1.30158	1.31886	1.28429		7129.8	1.31	1.333	1.294		7129	1.08819	1.06882	1.10757		7130.3	1.29297	1.25951	1.32644
7131.2	1.3086	1.2837	1.3335		7129.8	1.331	1.35548	1.30616		7130.8	1.26774	1.27944	1.25605		7129.4	1.3	1.314	1.288		7128.5	1.04557	1.03052	1.06063		7129.9	1.28184	1.2458	1.31787
7130.8	1.28789	1.24444	1.33134		7129.4	1.319	1.33359	1.30425		7130.4	1.28178	1.29722	1.26635		7129	1.26	1.316	1.208		7128	1.00058	0.973098	1.02807		7129.5	1.26721	1.23111	1.30332
7130.4	1.27098	1.24886	1.2931		7129	1.296	1.3137	1.27919		7130	1.25609	1.28483	1.22734		7128.6	1.23	1.236	1.226		7127.5	0.949348	0.923917	0.974779		7129.1	1.26404	1.24216	1.28591
7130	1.2473	1.21427	1.28033		7128.6	1.27	1.29878	1.24087		7129.6	1.24775	1.26058	1.23491		7128.2	1.21	1.231	1.19		7127	0.892943	0.872394	0.913492		7128.7	1.21641	1.19736	1.23546
7129.6	1.23339	1.19481	1.27197		7128.2	1.247	1.26194	1.23233		7129.2	1.22986	1.2376	1.22211		7127.8	1.17	1.207	1.128		7126.5	0.847029	0.820046	0.874011		7128.3	1.21586	1.19335	1.23837
7129.2	1.22085	1.18198	1.25972		7127.8	1.201	1.2229	1.17841		7128.8	1.18543	1.19003	1.18082		7127.4	1.1	1.132	1.058		7126	0.780981	0.755369	0.806593		7127.9	1.17753	1.15402	1.20104
7128.8	1.17616	1.14679	1.20554		7127.4	1.177	1.19499	1.15913		7128.4	1.14682	1.15178	1.14186		7127	1.05	1.07	1.026		7125.5	0.720854	0.697244	0.744464		7127.5	1.13862	1.10757	1.16968
7128.4	1.13658	1.12252	1.15065		7127	1.123	1.14279	1.10375		7128	1.08272	1.09397	1.07148		7126.6	1	1.04	0.959		7125	0.661942	0.637147	0.686736		7127.1	1.10171	1.08197	1.12146
7128	1.12032	1.08426	1.15638		7126.6	1.094	1.10666	1.0822		7127.6	1.05007	1.05568	1.04446		7126.2	0.92	0.967	0.874		7124.75	0.639836	0.616533	0.66314		7126.7	1.06598	1.04506	1.0869
7127.6	1.07273	1.04508	1.10038		7126.2	1.026	1.06246	0.99038		7127.2	1.01876	1.03715	1.00037		7125.8	0.878	0.943	0.812		7124.5	0.608179	0.594631	0.621726		7126.3	1.02258	1.00335	1.04182
7127.2	1.00763	0.96483	1.05042		7125.8	0.983	1.00762	0.95886		7126.8	0.97898	0.98243	0.97554		7125.4	0.827	0.895	0.758		7124.25	0.572842	0.556249	0.589434		7125.9	0.977893	0.936035	1.01975
7126.8	0.9716	0.94524	0.99796		7125.4	0.926	0.95303	0.89986		7126.4	0.93576	0.94549	0.92604		7125	0.779	0.849	0.709		7124	0.544513	0.520968	0.568057		7125.5	0.931714	0.910715	0.952713
7126.4	0.92651	0.90034	0.95268		7125	0.886	0.91508	0.85732		7126	0.89847	0.90344	0.89351		7124.6	0.731	0.803	0.66		7123.75	0.518621	0.497645	0.539597		7125.1	0.877578	0.841568	0.913589
7126	0.8935	0.87035	0.91665		7124.6	0.83	0.85501	0.80506		7125.6	0.83495	0.84372	0.82617		7124.2	0.669	0.728	0.61		7123.5	0.487226	0.467753	0.506698		7124.7	0.827125	0.792622	0.861629
7125.6	0.82316	0.80223	0.8441		7124.2	0.769	0.7923	0.74663		7125.2	0.78037	0.78486	0.77588		7123.8	0.62	0.688	0.552		7123.25	0.461334	0.442395	0.480272		7124.3	0.781995	0.76399	0.8
7125.2	0.7832	0.76119	0.80521		7123.8	0.718	0.73593	0.70106		7124.8	0.73103	0.74176	0.72031		7123.4	0.566	0.629	0.503		7123	0.43431	0.420166	0.448454		7123.9	0.725402	0.695475	0.755329
7124.8	0.71736	0.69046	0.74426		7123.4	0.662	0.6905	0.63388		7124.4	0.68368	0.6948	0.67256		7123	0.504	0.554	0.454		7122.75	0.403862	0.38772	0.420004		7123.5	0.67243	0.646511	0.698348
7124.4	0.66421	0.63844	0.68998		7123	0.611	0.63614	0.58504		7124	0.62122	0.63021	0.61223		7122.6	0.462	0.53	0.394		7122.5	0.377014	0.358785	0.395242		7123.1	0.622548	0.599912	0.645185
7124	0.60913	0.59661	0.62164		7122.6	0.554	0.56894	0.53868		7123.6	0.56867	0.58249	0.55484		7122.2	0.411	0.461	0.361		7122.25	0.354566	0.337015	0.372116		7122.7	0.569085	0.549667	0.588502
7123.6	0.57876	0.55568	0.60184		7122.2	0.498	0.5177	0.47907		7123.2	0.5118	0.532	0.4916		7121.8	0.365	0.432	0.297		7122	0.330075	0.317877	0.342273		7122.3	0.516668	0.496535	0.5368
7123.2	0.50842	0.4865	0.53035		7121.8	0.452	0.46903	0.43443		7122.8	0.46849	0.48574	0.45124		7121.4	0.307	0.36	0.253		7121.75	0.306096	0.289991	0.322201		7121.9	0.472168	0.455822	0.488514
7122.8	0.48001	0.471	0.48903		7121.4	0.394	0.41124	0.37583		7122.4	0.42599	0.44096	0.41103		7121	0.276	0.324	0.227		7121.5	0.285819	0.268511	0.303126		7121.5	0.424898	0.406795	0.443002
7122.4	0.42886	0.40893	0.44879		7121	0.353	0.36801	0.33839		7122	0.38031	0.39221	0.36841		7120.6	0.245	0.302	0.189		7121.25	0.258684	0.248673	0.268695		7121.1	0.377736	0.356448	0.399024
7122	0.38807	0.37631	0.39983		7120.6	0.311	0.32416	0.29817		7121.6	0.33219	0.34198	0.3224		7120.2	0.202	0.235	0.169		7121	0.243408	0.229061	0.257755		7120.7	0.331894	0.314582	0.349206
7121.6	0.3674	0.33953	0.39528		7120.2	0.269	0.27838	0.25921		7121.2	0.30183	0.31555	0.28811		7119.8	0.18	0.228	0.133		7120.75	0.226562	0.218461	0.234664		7120.3	0.293073	0.281318	0.304829
7121.2	0.31948	0.29253	0.34644		7119.8	0.233	0.24087	0.22458		7120.8	0.27545	0.28666	0.26424		7119.4	0.151	0.186	0.116		7120.5	0.208983	0.200274	0.217692		7119.9	0.259585	0.243301	0.275869
7120.8	0.28061	0.25922	0.302		7119.4	0.204	0.2091	0.19897		7120.4	0.23014	0.23706	0.22321		7119	0.13	0.155	0.105		7120.25	0.189531	0.179155	0.199908		7119.5	0.226398	0.20728	0.245517
7120.4	0.2569	0.23637	0.27743		7119	0.167	0.18168	0.15325		7120	0.20316	0.20841	0.19791		7118.6	0.111	0.135	0.087		7120	0.173591	0.167594	0.179589		7119.1	0.196517	0.179385	0.213648
7120	0.23566	0.21722	0.25411		7118.6	0.143	0.15126	0.13468		7119.6	0.17649	0.18341	0.16957		7118.2	0.1	0.127	0.073		7119.75	0.162393	0.155312	0.169473		7118.7	0.17557	0.164099	0.187042
7119.6	0.21183	0.19364	0.23002		7118.2	0.119	0.1298	0.10762		7119.2	0.15483	0.15784	0.15182		7117.8	0.092	0.113	0.071		7119.5	0.150403	0.140887	0.15992		7118.3	0.154352	0.138564	0.170141
7119.2	0.18166	0.17321	0.1901		7117.8	0.105	0.11299	0.09608		7118.8	0.12486	0.13123	0.11849		7117.4	0.0714	0.086	0.057		7119.25	0.139841	0.132339	0.147343		7117.9	0.134315	0.121394	0.147235
7118.8	0.16235	0.15218	0.17252		7117.4	0.088	0.09396	0.08272		7118.4	0.10926	0.11533	0.10319		7117	0.0686	0.084	0.054		7119	0.128399	0.122174	0.134625		7117.5	0.117935	0.105925	0.129944
7118.4	0.12996	0.12328	0.13664		7117	0.075	0.08358	0.06666		7118	0.09407	0.09993	0.08822		7116.6	0.059	0.071	0.047		7118.75	0.118036	0.109216	0.126856		7117.1	0.102813	0.0909251	0.114701
7118	0.11069	0.09764	0.12374		7116.6	0.068	0.07694	0.05947		7117.6	0.08134	0.08672	0.07597		7116.2	0.0524	0.054	0.05		7118.5	0.106365	0.10181	0.11092		7116.7	0.0840662	0.0806823	0.0874502
7117.6	0.09549	0.08438	0.10661		7116.2	0.056	0.06405	0.04885		7117.2	0.06741	0.07088	0.06394		7115.8	0.0497	0.063	0.037		7118.25	0.0984291	0.0947089	0.102149		7116.3	0.0752906	0.0745461	0.0760352
7117.2	0.07418	0.06883	0.07953		7115.8	0.05	0.05824	0.04242		7116.8	0.06416	0.07066	0.05767		7115.4	0.0464	0.05	0.042		7118	0.0931055	0.0879462	0.0982647		7115.9	0.0634601	0.0567101	0.07021
7116.8	0.06656	0.05948	0.07365		7115.4	0.047	0.05381	0.04022		7116.4	0.05897	0.05978	0.05816		7115	0.0439	0.05	0.038		7117.75	0.0825117	0.0796741	0.0853493		7115.5	0.0593419	0.0529787	0.065705
7116.4	0.05536	0.04546	0.06526		7115	0.039	0.04345	0.03469		7116	0.04965	0.05387	0.04542		7114.6	0.0478	0.052	0.044		7117.5	0.0782833	0.0754986	0.081068		7115.2	0.0509917	0.0479156	0.0540678
7116	0.06016	0.05347	0.06686		7114.6	0.038	0.04272	0.03357		7115.6	0.05166	0.05304	0.05028		7114.2	0.0513	0.058	0.044		7117.25	0.0684591	0.0664573	0.0704608		7115.1	0.0525987	0.0494328	0.0557646
7115.6	0.05916	0.05338	0.06493		7114.2	0.041	0.04512	0.03609		7115.2	0.05282	0.05923	0.0464		7113.8	0.0551	0.062	0.048		7117	0.0634957	0.0618299	0.0651616		7114.8	0.0505833	0.0479104	0.0532562
7115.2	0.05884	0.05431	0.06337		7113.8	0.044	0.04803	0.03984		7114.8	0.0546	0.06055	0.04864		7113.4	0.05	0.057	0.043		7116.75	0.0569969	0.0548596	0.0591342		7114.4	0.0538883	0.0502367	0.0575399
7114.8	0.05993	0.05515	0.0647		7113.4	0.046	0.0498	0.04144		7114.4	0.05654	0.06075	0.05233		7113	0.0472	0.055	0.039		7116.5	0.0521687	0.0497123	0.054625		7114	0.0540938	0.0522687	0.055919
7114.4	0.06172	0.05555	0.0679		7113	0.043	0.05077	0.03574		7114	0.05446	0.06026	0.04866		7112.6	0.0401	0.043	0.037		7116.25	0.0494266	0.0467011	0.0521521		7113.6	0.0565687	0.0532461	0.0598913
7114	0.06208	0.04903	0.07513		7112.6	0.04	0.04682	0.03344		7113.6	0.04839	0.05085	0.04592		7112.2	0.0367	0.043	0.03		7116	0.0448292	0.0422024	0.047456		7113.2	0.0500224	0.0487269	0.0513178
7113.6	0.05474	0.04851	0.06098		7112.2	0.037	0.04057	0.03352		7113.2	0.0417	0.04515	0.03826		7111.8	0.0311	0.034	0.028		7115.75	0.0445223	0.0410512	0.0479934		7112.8	0.0450035	0.0419598	0.0480472
7113.2	0.05011	0.04262	0.05759		7111.8	0.031	0.03565	0.02663		7112.8	0.03951	0.0443	0.03471		7111.4	0.0236	0.03	0.017		7115.5	0.0421069	0.0414908	0.042723		7112.4	0.0372946	0.0335541	0.0410351
7112.8	0.03746	0.03128	0.04364		7111.4	0.023	0.02802	0.01882		7112.4	0.03302	0.0403	0.02575		7111	0.0173	0.018	0.016		7115.25	0.0444102	0.041402	0.0474185		7112	0.0310806	0.0268991	0.0352621
7112.4	0.02979	0.02543	0.03414		7111	0.021	0.02581	0.01667		7112	0.02886	0.03308	0.02464		7110.6	0.0137	0.016	0.011		7115	0.0450867	0.0427203	0.0474531		7111.6	0.0213658	0.0182723	0.0244594
7112	0.02948	0.02452	0.03444		7110.6	0.013	0.0167	0.00941		7111.6	0.02013	0.02542	0.01485		7110.2	0.00696	0.013	0.001		7114.75	0.047914	0.0444298	0.0513981		7111.2	0.0159733	0.0118107	0.0201359
7111.6	0.01437	0.00662	0.02211		7110.2	0.01	0.01337	0.00599		7111.2	0.01584	0.01991	0.01177		7109.8	0.00847	0.012	0.005		7114.5	0.0458332	0.0428179	0.0488486		7110.8	0.012872	0.00943091	0.0163131
7111.2	0.01007	0.00641	0.01372		7109.8	0.009	0.01234	0.00492		7110.8	0.01059	0.01553	0.00565		7109.4	0.0074	0.011	0.004		7114.25	0.0484025	0.0459302	0.0508747		7110.4	0.0112647	0.00914911	0.0133802
7110.8	0.00633	-0.00143	0.01408		7109.4	0.006	0.00878	0.00291		7110.4	0.01277	0.01998	0.00557		7109	0.00771	0.011	0.004		7114	0.0479314	0.0446299	0.0512329		7110	0.00940344	0.00766327	0.0111436
7110.4	0.00519	0.00108	0.0093		7109	0.003	0.00539	0.00011		7110	0.00338	0.00822	-0.00146		7108.6	0.00569	0.007	0.004		7113.75	0.0450638	0.0442619	0.0458656		7109.6	0.00920287	0.00517611	0.0132296
7110	0.00324	0.00019	0.00628		7108.6	0	0.00399	-0.00313		7109.6	0.00554	0.00959	0.00149		7108.2	0.00326	0.006	0.001		7113.5	0.0433154	0.0418515	0.0447793		7109.2	0.00697329	0.00520393	0.00874265
7109.6	-0.00283	-0.00636	0.0007		7108.2	-0.001	0.00199	-0.00352		7109.2	0.00046	0.0078	-0.00688		7107.8	0.00683	0.013	0		7113.25	0.0409807	0.0400461	0.0419153		7108.8	0.00595432	0.00520767	0.00670097
7109.2	0.00377	-0.00166	0.00921		7107.8	0.001	0.00522	-0.0023		7108.8	0.00547	0.01073	0.00022		7107.4	0.000662	0.006	-0.004		7113	0.0378482	0.0344143	0.0412821		7108.4	0.00537829	0.00260286	0.00815372
7108.8	-0.00092	-0.00612	0.00428		7107.4	-0.001	0.00153	-0.00279		7108.4	0.00145	0.00693	-0.00403		7107	0.00149	0.003	0		7112.75	0.0355927	0.033647	0.0375383		7108	0.00519105	0.00283305	0.00754906
7108.4	0.0002	-0.00542	0.00582		7107	0.001	0.00536	-0.00288		7108	0.00247	0.0037	0.00124		7106	-0.00185	0.001	-0.005		7112.5	0.0317633	0.0282659	0.0352608		7107	0.00439539	0.00313848	0.0056523
7107.4	0.00337	-0.00446	0.01119		7106	-0.001	0.00424	-0.00535		7107	0.00203	0.00479	-0.00073		7105	-0.00129	0	-0.003		7112.25	0.0271098	0.0253687	0.0288509		7106	0.000599575	-0.00471526	0.00591441
7106.4	0.00038	-0.00332	0.00407		7105	-0.002	0.00252	-0.0072		7106	0.00112	0.0036	-0.00135		7104	-0.00252	0.003	-0.008		7112	0.0243356	0.0212301	0.027441		7105	0.00167758	0.00103227	0.00232289
7105.4	-0.00478	-0.01075	0.00118		7104	-0.002	0.0011	-0.0051		7105	0.00197	0.00476	-0.00083		7103	-0.00241	-0.001	-0.004		7111.75	0.0191145	0.0173949	0.0208341		7104	-0.000856668	-0.00176236	4.90258e-05
7104.4	0.00196	-0.00256	0.00648		7103	-0.003	0.00096	-0.00701		7104	-0.00338	-0.00182	-0.00493		7102	-0.00262	-0.002	-0.003		7111.5	0.0159975	0.0144044	0.0175906		7103	-0.000820912	-0.0011526	-0.00048922
7103.4	0.00174	-0.00612	0.0096		7102	-0.004	-0.00175	-0.00646		7103	-0.00365	0.00017	-0.00747							7111.25	0.0127758	0.0109856	0.014566
																				7111	0.0104994	0.0078934	0.0131053
																				7110	0.00531452	0.00404677	0.00658226
Baseline corrected pre-edge																				7109	0.00176432	-0.00279365	0.00632229
D1					D8					D8 SIH					D8 Lip-1					7108	0.00506254	0.0036131	0.00651197
Energy (eV)	H - G				Energy (eV)	H - G				Energy (eV)	H - G				Energy (eV)	H - G				7107	0.00204089	0.000836512	0.00324527
7130	-0.00743654				7129.4	0.0186436				7130.4	0.0134809				7129.4	0.00748666				7106	7.2063e-05	-0.00161592	0.00176004
7129.6	-0.00110907				7129	0.00688415				7130	-0.00073819				7129	-0.00637784				7105	-0.000627623	-0.00188131	0.000626059
7129.2	0.011565				7128.6	-0.00113413				7129.6	0.00828996				7128.6	-0.00432467				7104	-0.00133201	-0.00322411	0.00056009
7128.8	-0.00325384				7128.2	0.00030365				7129.2	0.0134177				7128.2	0.0131675				7103	0.00121996	-0.0001431	0.00258303
7128.4	-0.00867831				7127.8	-0.0151857				7128.8	-0.00266977				7127.8	0.01555
7128	0.0130836				7127.4	-0.00307323				7128.4	-0.00800633				7127.4	-0.00778317
7127.6	0.00692704				7127	-0.0159061				7128	-0.0343563				7127	-0.00748015
7127.2	-0.0138107				7126.6	0.00070653				7127.6	-0.0252838				7126.6	-0.0042169
7126.8	-0.00305087				7126.2	-0.0178918				7127.2	-0.0114417				7126.2	-0.028682
7126.4	0.00056614				7125.8	-0.00838897				7126.8	-0.00321014				7125.8	-0.0135622
7126	0.0176698				7125.4	-0.0104888				7126.4	0.00385583				7125.4	-0.00652852
7125.6	-0.00165173				7125	0.00610482				7126	0.0185376				7125	0.00377616
7125.2	0.00982626				7124.6	0.00770208				7125.6	0.00809422				7124.6	0.0137483
7124.8	-0.00461753				7124.2	0.0046411				7125.2	0.00713305				7124.2	0.00883279
7124.4	-0.00684422				7123.8	0.0112996				7124.8	0.011419				7123.8	0.0155309
7124	-0.0118695				7123.4	0.0121049				7124.4	0.0172026				7123.4	0.0154052
7123.6	0.00659079				7123	0.0165422				7124	0.00692724				7123	0.00508336
7123.2	-0.00645686				7122.6	0.0131601				7123.6	0.00520394				7122.6	0.0122598
7122.8	0.0106188				7122.2	0.0085749				7123.2	-0.00255447				7122.2	0.00769537
7122.4	0.00292442				7121.8	0.0114719				7122.8	0.00122888				7121.8	0.00521539
7122	0.00338168				7121.4	-0.00039461				7122.4	0.00355571				7121.4	-0.0122933
7121.6	0.0216164				7121	0.00179704				7122	0.00024221				7121	-0.00588686
7121.2	0.0101666				7120.6	-6.793e-05				7121.6	-0.00811266				7120.6	-0.00256983
7120.8	0.00815954				7120.2	-0.0050452				7121.2	-0.00139989				7120.2	-0.014301
7120.4	0.0171691				7119.8	-0.00713698				7120.8	0.00655603				7119.8	-0.00799963
7120	0.0236916				7119.4	-0.00529833				7120.4	-0.00715714				7119.4	-0.0115524
7119.6	0.0295725				7119	-0.0144439				7120	-0.00524413				7119	-0.00981947
7119.2	0.017532				7118.6	-0.0134548				7119.6	-0.00565721				7118.6	-0.00864091
7118.8	0.0201208				7118.2	-0.0151854				7119.2	-0.00360134				7118.2	-0.00184264
7118.4	0.00890661				7117.8	-0.00946995				7118.8	-0.0122793				7117.8	0.00575828
7118	0.00802993				7117.4	-0.00912871				7118.4	-0.00887686				7117.4	-0.00125123
7117.6	0.00750047				7117	-0.00697353				7118	-0.00720707				7117	0.00771554
7117.2	-0.00057614				7116.6	-0.00081285				7117.6	-0.00506508				7116.6	0.00824163
7116.8	-0.00234138				7116.2	-0.00145599				7117.2	-0.00595176				7116.2	0.0103034
7116.4	-0.00455647				7115.8	0.00228324				7116.8	0.00217271				7115.8	0.0149685
7116	0.00759533				7115.4	0.00758364				7116.4	0.00684598				7115.4	0.0178938
7115.6	0.0147868				7115	0.0066144				7116	0.00603101				7115	0.0206249
7115.2	0.0215453				7114.6	0.0115335				7115.6	0.0153342				7114.6	0.0288948
7114.8	0.0287215				7114.2	0.0194864				7115.2	0.0227137				7114.2	0.036024
7114.4	0.0357185				7113.8	0.0266061				7114.8	0.0297685				7113.8	0.0428206
7114	0.0405113				7113.4	0.0320121				7114.4	0.0361578				7113.4	0.0401807
7113.6	0.0369265				7113	0.0318114				7114	0.0378106				7113	0.0393887
7113.2	0.0354622				7112.6	0.0310983				7113.6	0.0348552				7112.6	0.0339184
7112.8	0.0254678				7112.2	0.0299557				7113.2	0.0307502				7112.2	0.0318335
7112.4	0.0200149				7111.8	0.0254554				7112.8	0.0306942				7111.8	0.0272887
7112	0.0215468				7111.4	0.0186591				7112.4	0.0259565				7111.4	0.0206306
7111.6	0.00795984				7111	0.0176197				7112	0.0232277				7111	0.0149986
7111.2	0.00491306				7110.6	0.0103818				7111.6	0.0156606				7110.6	0.0119255
7110.8	0.00219938				7110.2	0.00798299				7111.2	0.0123105				7110.2	0.00559895
7110.4	0.0018959				7109.8	0.00745442				7110.8	0.00781616				7109.8	0.00743147
7110	0.00062447				7109.4	0.004822				7110.4	0.0106005				7109.4	0.00661168
7109.6	-0.00489767				7109	0.00210696				7110	0.0016914				7109	0.00711472
7109.2	0.00214257				7108.6	-0.00067338				7109.6	0.00423202				7108.6	0.00524282
7108.8	-0.00219533				7108.2	-0.00150504				7109.2	-0.00054828				7108.2	0.00292582
7108.4	-0.00079505				7107.8	0.00062324				7108.8	0.0046965				7107.8	0.00658157
					7107.4	-0.00127955				7108.4	0.00085947				7107.4	0.00047827
					7107	0.00079368				7108	0.00202133				7107	0.00135483
