# Supplementary material for: Changes in ferrous iron and glutathione promote ferroptosis and frailty in aging Caenorhabditis elegans
Source: eLife. 2020 Jul 21;9:e56580. doi: 10.7554/eLife.56580 (PMC7373428; doi:10.7554/eLife.56580)
Supplement: Figure 5—source data 1. [file elife-56580-fig5-data1.xlsx]

## Sheet: survival at 25 ºC 
Replicate 1
	control	Age	Alive	Dead	Censored
		2	91	0	0
		5	60	31	0
		6	35	25	0
		7	24	11	0
		9	12	12	0
		10	12	0	0
		11	5	4	3
		12	3	2	0
		13	2	1	0
		15	2	0	0
		16	2	0	0
		17	0	2	0
			Total	88	3
	Lip-1	Age	Alive	Dead	Censored
		2	104	0	0
		5	83	21	0
		6	71	11	1
		7	70	1	0
		9	65	5	0
		10	62	3	0
		11	53	9	0
		12	45	8	0
		13	41	4	0
		15	34	7	0
		16	30	4	0
		17	25	5	0
		18	15	10	0
		19	11	4	0
		21	4	7	0
		23	1	3	0
		25	0	1	0
			Total	103	1
	SIH	Age	Alive	Dead	Censored
		2	75	0	0
		5	74	1	0
		6	71	2	1
		7	68	2	1
		9	63	3	2
		10	56	7	0
		11	46	10	0
		12	40	6	0
		13	30	10	0
		15	15	15	0
		16	11	4	0
		17	7	4	0
		18	2	5	0
		19	0	2	0
			Total	71	4
Replicate 2
	control	Age	Alive	Dead	Censored
		2	71	0	0
		5	62	2	7
		7	40	19	3
		8	20	20	0
		9	16	4	0
		11	9	7	0
		12	6	3	0
		14	1	5	0
		16	0	1	0
			Total	61	10
	Lip-1	Age	Alive	Dead	Censored
		2	94	0	0
		5	90	4	0
		7	69	19	2
		8	55	13	1
		9	45	7	3
		11	36	9	0
		12	32	4	0
		14	21	11	0
		16	12	9	0
		17	7	5	0
		19	1	6	0
		20	0	1	0
			Total	88	6
	SIH	Age	Alive	Dead	Censored
		2	103	0	0
		5	103	0	0
		7	97	5	1
		8	84	9	4
		9	78	4	2
		11	58	20	0
		12	48	10	0
		14	17	31	0
		16	9	8	0
		17	2	7	0
		19	0	2	0
			Total	96	7
Replicate 3
	control	Age	Alive	Dead	Censored
		3	112	0	0
		5	110	2	0
		6	97	13	0
		8	63	32	2
		9	43	20	0
		11	28	14	1
		12	18	10	0
		14	15	3	0
		15	9	6	0
		16	7	2	0
		18	2	5	0
		19	1	1	0
		21	0	1	0
			Total	109	3
	Lip-1	Age	Alive	Dead	Censored
		3	110	0	0
		5	106	4	0
		6	97	8	1
		8	83	13	1
		9	78	5	0
		11	72	6	0
		12	64	8	0
		14	51	13	0
		15	45	6	0
		16	34	11	0
		18	24	10	0
		19	15	9	0
		21	10	5	0
		23	4	6	0
		24	0	4	0
			Total	108	2
	SIH	Age	Alive	Dead	Censored
		3	88	0	0
		5	88	0	0
		6	88	0	0
		8	81	3	4
		9	79	1	1
		11	73	5	1
		12	63	10	0
		14	54	9	0
		15	43	11	0
		16	34	9	0
		18	11	22	1
		19	3	8	0
		21	1	2	0
		23	0	1	0
			Total	81	7
Replicate 4
	control	Age	Alive	Dead	Censored
		3	100	0	0
		5	98	2	0
		7	30	68	0
		8	18	11	1
		10	11	7	0
		12	8	3	0
		13	7	1	0
		14	6	1	0
		16	3	3	0
		18	1	2	0
		19	0	1	0
			Total	99	1
	Lip-1	Age	Alive	Dead	Censored
		3	148	0	0
		5	140	7	1
		7	107	33	0
		8	104	3	0
		10	100	4	0
		12	93	7	0
		13	87	6	0
		14	69	18	0
		16	37	32	0
		18	22	15	0
		19	13	9	0
		20	5	8	0
		21	4	1	0
		22	2	2	0
		24	0	2	0
			Total	147	1
	SIH	Age	Alive	Dead	Censored
		3	121	0	0
		5	119	0	2
		7	112	2	5
		8	108	2	2
		10	104	4	0
		12	92	12	0
		13	80	11	1
		14	70	10	0
		16	28	42	0
		18	9	19	0
		19	2	7	0
		20	0	2	0
			Total	111	10
Replicate 5
	control	Age	Alive	Dead	Censored
		3	107	0	0
		4	105	0	2
		5	99	3	3
		7	66	32	1
		9	33	33	0
		10	25	8	0
		11	12	3	10
		12	6	6	0
		14	4	2	0
		15	3	1	0
		17	3	0	0
		18	2	1	0
		19	0	2	0
			Total	91	16
	Lip-1	Age	Alive	Dead	Censored
		3	93	0	0
		4	91	2	0
		5	81	6	4
		7	71	8	2
		9	64	7	0
		10	61	2	1
		11	52	9	0
		12	46	6	0
		14	41	5	0
		15	22	19	0
		17	7	15	0
		18	4	3	0
		19	3	1	0
		20	2	1	0
		21	2	0	0
		23	2	0	0
		24	1	1	0
		25	1	0	0
		26	0	1	0
			Total	86	7
	SIH	Age	Alive	Dead	Censored
		3	102	0	0
		4	102	0	0
		5	99	0	3
		7	95	2	2
		9	89	5	1
		10	85	4	0
		11	71	12	2
		12	56	15	0
		14	28	27	1
		15	12	16	0
		17	1	11	0
		18	0	1	0
			Total	93	9
Replicate 6
	control	Age	Alive	Dead	Censored
		4	108	0	0
		7	56	51	1
		8	15	41	0
		10	11	4	0
		11	1	0	10
		12	1	0	0
		13	1	0	0
		14	1	0	0
		16	0	1	0
			Total	97	11
	Lip-1	Age	Alive	Dead	Censored
		4	118	0	0
		7	83	29	6
		8	74	9	0
		10	62	12	0
		11	58	4	0
		12	53	5	0
		13	43	10	0
		14	31	12	0
		16	24	7	0
		17	19	5	0
		18	17	2	0
		19	12	5	0
		20	8	4	0
		21	2	6	0
		22	1	1	0
		24	1	0	0
		25	0	1	0
			Total	112	6
	SIH	Age	Alive	Dead	Censored
		4	115	0	0
		7	109	1	5
		8	105	4	0
		10	96	7	2
		11	90	6	0
		12	81	9	0
		13	53	25	3
		14	38	15	0
		16	20	18	0
		17	16	4	0
		18	10	6	0
		19	4	6	0
		20	2	2	0
		21	1	1	0
		22	1	0	0
		24	0	1	0
			Total	105	10
Replicate 7
	control	Age	Alive	Dead	Censored
		4	94	1	0
		7	27	65	2
		9	15	12	0
		11	11	4	0
		13	7	4	0
		15	3	4	0
		17	1	2	0
		19	1	0	0
		21	0	1	0
			Total	93	2
	Lip-1	Age	Alive	Dead	Censored
		4	86	0	0
		7	62	18	6
		9	60	2	0
		11	53	7	0
		13	46	7	0
		15	33	13	0
		17	25	8	0
		19	15	10	0
		21	12	3	0
		23	6	6	0
		25	1	5	0
		27	0	1	0
			Total	80	6
2017-03-01	SIH	Age	Alive	Dead	Censored
		4	119	0	0
		7	97	1	21
		9	91	4	2
		11	84	4	3
		13	75	6	3
		15	62	13	0
		17	36	26	0
		19	17	19	0
		21	6	11	0
		23	4	2	0
		25	2	2	0
		27	1	1	0
		29	0	1	0
			Total	90	29
Replicate 8
2017-03-06	2017-03-06	combined data
	control	Age	Alive	Dead	Censored
		4	76	1	0
		6	56	19	1
		8	18	35	3
		10	10	8	0
		12	8	1	1
		14	6	2	0
		16	5	1	0
		18	4	1	0
		20	1	3	0
		22	0	1	0
			Total	72	5
	Lip-1	Age	Alive	Dead	Censored
		4	90	0	0
		6	78	12	0
		8	68	5	5
		10	56	12	0
		12	43	13	0
		14	29	14	0
		16	22	7	0
		18	14	8	0
		20	6	8	0
		22	3	3	0
		24	1	2	0
		26	0	1	0
			Total	85	5
	SIH	Age	Alive	Dead	Censored
		4	86	0	0
		6	85	1	0
		8	77	1	7
		10	75	2	0
		12	66	4	5
		14	58	7	1
		16	48	10	0
		18	38	10	0
		20	30	8	0
		22	6	24	0
		24	2	4	0
		26	0	2	0
			Total	73	13
Fig S19
Control
Age	Dead	Censored
5	1	0
6	7	1
8	23	0
9	26	5
10	4	0
12	8	1
13	2	0
15	10	0
16	1	0
18	5	0
21	4	0
23	2	0
25	0	0
	93	7
Control + AMP
Age	Dead	Censored
5	0	0
6	0	4
8	1	2
9	15	2
10	5	0
12	13	0
13	5	0
15	9	0
16	11	0
18	8	0
21	10	0
23	3	0
25	0	0
	80	8
250 μM SIH
Age	Dead	Censored
5	0	0
6	0	3
8	0	11
9	2	5
10	3	1
12	4	1
13	10	2
15	20	0
16	17	0
18	18	0
21	10	0
23	1	0
25	0	0
	85	23
250 μM SIH + AMP
Age	Dead	Censored
5	0	0
6	0	4
8	0	3
9	1	1
10	0	1
12	2	1
13	4	0
15	6	0
16	9	0
18	18	1
21	27	0
23	17	0
25	4	0
	88	11

## Sheet: dose response - survival
Fig S6A
control				25 μM Lpx				100 μM Lpx				200 μM Lpx				250 μM SIH
Age	Dead	censored		Age	Dead	censored		Age	Dead	censored		Age	Dead	censored		Age	Dead	censored
2	0	0		2	0	0		2	0	0		2	0	0		2	0	0
5	31	0		5	34	0		5	32	0		5	21	0		5	1	0
6	25	0		6	21	0		6	15	0		6	11	1		6	2	1
7	11	0		7	14	0		7	7	0		7	1	0		7	2	1
9	12	0		9	7	0		9	2	0		9	5	0		9	3	2
10	0	0		10	1	0		10	5	0		10	3	0		10	7	0
11	4	3		11	1	1		11	7	0		11	9	0		11	10	0
12	2	0		12	0	0		12	4	0		12	8	0		12	6	0
13	1	0		13	2	0		13	0	0		13	4	0		13	10	0
15	0	0						15	5	0		15	7	0		15	15	0
16	0	0			80	1		16	3	0		16	4	0		16	4	0
17	2	0						17	5	0		17	5	0		17	4	0
								18	5	0		18	10	0		18	5	0
	88	3										19	4	0		19	2	0
									90	0		21	7	0
												23	3	0			71	4
												25	1	0
													103	1
Fig S6 B
Control					250 μM SIH				1 μM Lpx				10 μM Lpx				100 μM Lpx
Age	Dead	Censored		Age	Dead	Censored		Age	Dead	Censored		Age	Dead	Censored		Age	Dead	Censored
4	0	5		4	0	0		4	0	0		4	0	0		4	0	5
6	17	1		6	2	1		6	13	1		6	15	4		6	13	1
7	26	3		7	3	0		7	26	3		7	24	1		7	16	6
9	24	0		9	8	3		9	27	2		9	15	0		9	17	0
10	4	0		10	3	4		10	2	0		10	6	0		10	2	0
11	2	0		11	6	5		11	2	0		11	2	0		11	7	0
13	3	0		13	16	2		13	1	0		13	1	0		13	5	0
14	2	0		14	8	0		14	1	0		14	3	0		14	7	1
16	0	0		16	11	0		16	1	0		16	0	0		16	8	0
18	1	0		18	7	0		18	0	0		18	2	0		18	7	0
20	1	0		20	2	0		20	1	0		20	1	0		20	4	0
	80	9			66	15			74	6			69	5			86	13
Fig S6 C
Control				250 μM SIH				5 μM Fer-1				200 μM Fer-1
Age	Dead	Censored		Age	Dead	Censored		Age	Dead	Censored		Age	Dead	Censored
4	0	0		4	0	0		4	0	0		4	0	0
5	1	1		5	0	0		5	0	0		5	0	1
7	21	0		7	0	1		7	6	0		7	11	6
9	8	4		9	0	0		9	15	3		9	10	7
10	7	0		10	0	5		10	3	0		10	5	0
11	4	0		11	2	0		11	3	0		11	0	0
12	1	0		12	1	0		12	3	0		12	4	2
15	9	1		15	19	0		15	12	0		15	6	1
16	3	0		16	4	0		16	3	0		16	4	0
18	4	0		18	16	0		18	7	1		18	4	0
19	0	0		19	12	0		19	0	0		19	0	0
21	2	0		21	12	0		21	5	0		21	1	0
24	0	0						24	2	0		24	0	0
25	0	0			66	6		25	1	0		25	1	0
27	1	0						27	1	0
								29	1	0			46	17
	61	6
									62	4
Fig S6 D
Control				100µM SIH				250µM SIH
Age	Dead	Censored		Age	Dead	Censored		Age	Dead	Censored
1	0	0		1	0	0		1	0	0
3	0	8		3	0	2		3	0	0
5	3	4		5	0	2		5	0	7
7	6	0		7	1	0		7	0	0
9	13	0		9	2	0		9	3	3
10	11	0		10	0	4		10	1	1
11	12	0		11	5	0		11	5	0
12	9	0		12	13	0		12	2	0
14	9	0		14	10	0		14	9	1
15	6	0		15	12	0		15	7	0
16	7	0		16	4	0		16	4	0
17	3	0		17	9	0		17	9	0
18	2	0		18	6	0		18	5	4
19	5	0		19	6	0		19	5	0
21	4	0		21	8	0		21	11	0
23	1	0		23	14	0		23	16	0
				26	6	0		26	18	0
	91	12		29	2	0		29	6	0
				31	1	0		31	2	0
								33	0	0
					99	8
									103	16
Fig S6E
control				250 µM SIH				125 µM Fe(SIH)2
Age	Dead	Censored		Age	Dead	Censored		Age	Dead	Censored
3	0	0		3	0	0		3	0	0
5	0	6		5	0	0		5	0	0
6	17	0		6	2	4		6	17	2
7	20	3		7	0	4		7	31	3
8	17	0		8	1	1		8	18	0
9	3	1		9	0	3		9	6	0
11	3	1		11	7	5		11	10	0
13	6	0		13	10	0		13	3	0
14	3	0		14	12	0		14	2	0
16	6	0		16	33	0		16	6	0
18	2	0		18	12	0		18	2	0
20	1	0		20	11	0		20	4	0
21	1	0		21	9	0
22	0	0		22	7	0			99	5
24	1	0		24	6	0
	80	11			110	17

## Sheet: survival 20 ºC-25 ºC comparison
survival at 20 ºC						survival at 25 ºC
Replicate 1						Replicate 1
Control						Control
Age	Alive	Dead	Censored			Age	Alive	Dead	Censored
2	137	0	0			1	100	0	0
3	137	0	0			2	96	0	4
4	137	0	0			4	84	0	12
5	131	0	6			5	82	1	1
6	115	0	16			6	73	6	3
7	106	2	7			7	57	12	4
8	102	1	3			8	38	19	0
9	86	15	1			9	25	13	0
11	65	17	4			10	20	5	0
12	59	5	1			12	15	5	0
13	53	6	0			13	13	2	0
15	32	21	0			15	5	8	0
17	24	8	0			16	5	0	0
19	16	8	0			18	4	1	0
20	11	5	0			20	1	3	0
22	3	8	0			21	0	1	0
24	0	3	0				Total	76	24
	Total	99	38
Replicate 1						Replicate 1
SIH						SIH
Age	Alive	Dead	Censored			Age	Alive	Dead	Censored
2	143	0	0			1	104	0	0
3	143	0	0			2	101	0	3
4	143	0	0			4	101	0	0
5	142	0	1			5	99	0	2
6	138	0	4			6	95	3	1
7	138	0	0			7	93	0	2
8	129	0	9			8	84	7	2
9	125	0	4			9	76	4	4
11	107	5	13			10	71	5	0
12	102	2	3			12	59	12	0
13	96	3	3			13	49	10	0
15	74	19	3			15	32	17	0
17	54	18	2			16	14	18	0
19	35	19	0			18	2	12	0
20	29	6	0			20	0	2	0
22	5	24	0				Total	90	14
24	2	3	0
26	0	2	0
	Total	101	42
Replicate 2						Replicate 2
Control						Control
Age	Alive	Dead	Censored			Age	Alive	Dead	Censored
3	118	0	0			5	82	0	0
5	109	0	9			7	60	22	0
7	95	1	13			8	44	16	0
10	49	41	5			11	24	19	1
11	43	4	2			12	24	0	0
13	29	12	2			15	13	11	0
14	18	9	2			17	4	9	0
16	14	3	1			20	1	3	0
19	8	6	0			21	1	0	0
20	2	6	0			23	1	0	0
22	2	0	0			25	0	1	0
24	1	1	0				Total	81	1
26	0	1	0
28	0	0	0
	Total	84	34
SIH						SIH
Age	Alive	Dead	Censored			Age	Alive	Dead	Censored
3	110	0	0			5	76	0	0
5	110	0	0			7	76	0	0
7	100	0	10			8	76	0	0
10	96	0	4			11	73	1	2
11	83	2	11			12	72	1	0
13	80	2	1			15	58	12	2
14	75	3	2			17	33	20	5
16	65	8	2			20	14	19	0
19	54	11	0			21	12	2	0
20	41	13	0			23	4	8	0
22	31	10	0			25	2	2	0
24	13	18	0			27	0	2	0
26	5	8	0				Total	67	9
28	0	5	0
	Total	80	30

## Sheet: Bacterial growth
	Sample	No OP50	+OP50	OP50+ 50 µg/mL Amp	OP50+ 100µg/mL Amp	OP50 + 200µM Lip-1	OP50 + 250µM SIH
Replicate #1	1	0.073	0.32	0.078	0.073	0.352	0.306
O.D. 600nm	2	0.074	0.314	0.109	0.074	0.666	0.419
	3	0.074	0.317	0.071	0.074	0.428	0.374
	4	0.078	0.405	0.079	0.078	0.421	0.403
	5	0.065	0.319	0.072	0.065	0.441	0.375
	6	0.077	0.323	0.085	0.077	0.36	0.377
	7	0.072	0.337	0.071	0.072	0.471	0.293
	8	0.081	0.354	0.086	0.081	0.413	0.288
Replicate #2	1	0.097	0.374	0.095	0.1	0.396	0.385
O.D. 600nm	2	0.105	0.369	0.114	0.106	0.369	0.435
	3	0.094	0.437	0.104	0.105	0.369	0.416
	4	0.103	0.424	0.111	0.112	0.398	0.385
	5	0.118	0.414	0.113	0.108	0.369	0.37
	6	0.114	0.385	0.112	0.123	0.373	0.497
	7	0.109	0.422	0.119	0.116	0.394	0.384
	8	0.114	0.49	0.112	0.116	0.352	0.54
