# Supplementary material for: Changes in ferrous iron and glutathione promote ferroptosis and frailty in aging Caenorhabditis elegans
Source: eLife. 2020 Jul 21;9:e56580. doi: 10.7554/eLife.56580 (PMC7373428; doi:10.7554/eLife.56580)
Supplement: Figure 6—source data 1. [file elife-56580-fig6-data1.xlsx]

## Sheet: fertility
Early fertility
Ctl	SIH	Lip-1
46	32	58
46	53	73
57	41	45
66	34	53
49	75	48
64	55	45
74	74	33
48	41	64
79	45	49
64	53	61
83	92	76
59	75	68
83	65	83
63	80	79
62	74	65
80	63	52
86	71	93
77	81	49
83	77	52
46	85	64
56	61	51
74	66	72
86	76	63
86	66	75
76	51	76
	87	60
Total fertility
Ctl	SIH	Lip-1
288	318	256
350	236	267
283	292	256
309	275	206
197	293	224
264	260	244
223	287	307
340	282	255
219	296	294
245	251	230
266	299	241
320	345	218
331	295	232
363	348	294
315	215	207
253	310	282
289	255	222
306	271
286	264
304
213

## Sheet: Length
Start	Day 1 Ctl	Day 1 Lip-1	Day 1 SIH	Day 4 Ctl	Day 4 Lip-1	Day 4 SIH	Day 8 Ctl	Day 8 Lip-1	Day 8 SIH
1234.82	1376.25	1351.72	1370.88	1648.67	1448.31	1718.72	1526.19	1490.8	1679.11
1271.2	1326.87	1204.79	1433.18	1449.51	1588.9	1642.12	1458.28	1435.83	1770.84
1262.13	1341.13	1435.35	1437.65	1416.97	1431.26	1597.34	1361.59	1544.06	1717.97
1254.29	1410.31	1371.18	1371.53	1610.43	1330.29	1648.05	1291.44	1515.32	1706.91
1194.55	1322.01	1378.69	1249.34	1547.57	1317.75	1772.55	1229.37	1171.49	1776.48
1175.89	1406.12	1357.42	1368.56	1427.39	1327.62	1702.57	1340.03	1517.47	1715.15
1173.26	1272.59	1380.3	1401.05	1595.96	1563.96	1710.91	1619.13	1330.97	1638.58
1169.77	1324.54	1334.02	1370.59	1537.74	1263.58	1631.73	1351.92	1292.57	1638.47
1168.93	1370.96	1370.24	1402.21	1581.17	1211.59	1636.98	1564.97	1554.47	1532.48
1167.38	1359.75	1330.25	1467.59	1254.45	1339.22	1569.14	1359.89	1284.15	1672.21
1161.84	1325.15	1339.11	1388.39	1344.25	1452.82	1661.09	1402.62		1733.89
1157.13	1429.48	1336.13	1329.1	1296.79	1275.04	1638.66	1557.48		1703.52
1142.62	1277.08	1309.16	1379.85	1131.44	1350.65	1517.3	1394.96		1733.15
1136.75	1307.38	1381.26	1374.52	1451.61	1360.06	1635.51	1589.47		1657.65
1129.72	1365.98	1355.65	1418.52	1556.51	1127.82	1554.22	1607.28		1750.43
1122.1	1376.79	1321.88	1402.19	1528.79	1035.79	1621.36	1506.13		1814.79
1116.35	1282.42	1369.12	1346.08	1492.95	1424.04	1665.35	1310.78		1653.25
1115.16	1295.04	1373.22	1366.07	1477.91	1326.07	1601.31			1766.86
1113.83	1395.97	1422.08	1081.61	1517.94	1473.18	1709.56			1636.75
1109.82	1405.35	1423.38	1427.27	1430.23	1203.43	1569.34			1649.47
1109.32	1428.83	1346.59	1385.43	1630.47	1252.6	1535.59			1673.62
1107.15	1453.05	1279.54	1405.33	1591.8	1053.31	1530.44
1105.38	1323.52	1302.78	1397.5	1317.12	1482.73	1565.96
1103.12	1298.44	1316.63	1023.64	1476.37	1442.88	1427.4
1102.82	1378.62	1351.71	1407.97	1205.33	1314.55	1542.28
1096.17	1349.55	1295.72	1425.34	1489.15	1407.17	1527.3
1094.98	1380.58	1369.1	1405.99	1505.04	1537.45	1621.52
1092.01	1158.77	1283.02	1431.56	1293.3	1371.87	1711.76
1091.14	1495.52	1311.46	1428.5	1315.11	1334.27	1602.94
1085.79	1377.79	1315.26	1423.73	1598.17	1345.17	1445.96
1085.01	1383.53	1405.26	1356.54	1250.8	1278.36	1399.79
1083.54	1431.72	1301.04	1392.13	1085.56	1274.01	1732.49
1082.62	1462.07	1445.82	1422.15	1344.31	1446.32	1376.53
1079.6	1387.96	1363.06	1483.51	1523.91	1482.33	1638.47
1078.26	1420.27	1205.78	1423.18	1542.93	1268.87	1622.47
1076.27	1434.79	1285.59	1496.49	1433.63	1337.42	1538.16
1074.39	1468.7	1284.24	1427.96	1436.4	1294.35	1638.57
1072.01	1309.82	1361.01	1447.25	1429.92	1378.99	1471.73
1071.28	1393.25	1388.06	1422	1149.73	1089.59	1489.12
1069.98	1439.13	1422.62	1404.88	934.208	1344.92	1569.83
1068.07	1484.29	1390.41	1434.58	1393.8	1407.66	1549.1
1066.12	1329.36	1383.26	1396.09	1349.51	1448.41	1654.57
1064.94	1351.09	1347.96	1494.58	1497.47	1440.48	1630.38
1062.67	1457.19	1340.85	1478.15	1529.15	1299.79	1671.65
1061.77	1405.23	1423.41	1430.01	1633.68	1361.64	1659.95
1057.71	1425.59	1311.13	1425.11	1339.16	1463.57	1607.28
1057.11	1402.15	1315.09	1318.58	1519.27	1469.84	1646.84
1053.79	1471.07	1488.08	1427.44	1186.47	1375.31	1674.31
1053.34	1400.72	1347.07	1416.42	1428.58	1022.75	1668.28
1052.88	1386.12	1364.28	1385.18	1589.86		1520.85
1052.88	1394.55	1363.58	1476.88	1430.13		1586.43
1050.59	1401.15	1352.46	1394.19	1431.71		1721.82
1047.82	1426.71	1385.39	1445.36	1302.88		1552.9
1041.93	1318.32	1114.16	1353.19	1476.36		1608.67
1040.6	1363.45	1204.11	1361.38	1376.86		1600.36
1038.36	1413.77	1395	1471.48	1487.42		1692.41
1037.28	1338.73	1445.12	1389.69	1478.21		1610.59
1035.49	1338.63	1319.45	1495.6	1439.67		1609.02
1035.39	1510.67	1359.24	1442.84	1337.42		1577.13
1030.29	1386.05	1385.96	1476.27	1240		1636.96
1029.03	1393.05	1483.77	1430.88	1255.63		1613.39
1028.48	1454.09	1429.39	1501.55	1109.8		1561.91
1026.21	1438.64	1429.76	1163.28	1328.72		1611.33
1023.49	1467.13	1454.48	1385.75	1305.15		1632.71
1023.31	1527.5	1264.77	1429.71	1436.2		1615.11
1021.35	1361.99	1392.14	1482.48	1395.57		1565.19
1021.29	1413.88	1330.84	1472.69	1402.48		1618.97
1019.35	1447.11	1406.08	1345.47	1452.87		1634.75
1017.02	1477.68	1160.66	1520.71	1303.04
1016.92	1379.22	1316.4	1365.92	1408.41
1016.6	1340.85	1354.77	1376.39	1660.1
1013.81	1465.98	1414.33	1367.55
1013.31	1359.68	1263.09	1420.5
1012.3	1217.75	1400.14	1440.97
1011.54	1462.06	1384.68	1365.3
1011.09	1371.35	1387.98	1478.28
1007.74	1360.38	1374.83	1447.31
1003.4	1467.45	1441.53	1363.61
1001.29	1414.45	1457.55	1427.99
1001.12	1381.13	1356.21	1399.24
1000.21	1518.04	1366.18	1398.68
999.515	1258.89	1364.16	1452.58
997.131		1386.86	1442.63
993.391		1425.85	1451.13
992.076		1398.95	1454.58
991.227		1382.68	1164.81
991.056		1414.02	1316.86
990.894		1402.13	1337.26
990.182		1450.03	1500.88
988.308		1269.33	1405.26
985.478		1426.63
983.203		1404.97
982.288		1242.7
979.987		1449.75
979.741		1350.96
978.577		1347.69
976.381		1409.87
974.571		1301.22
970.522
969.722
969.6
966.798
965.885
964.797
964.706
962.985
961.402
960.452
958.991
956.31
950.607
950.464
941.316
939.804
938.378
936.786
925.672
917.91
916.832
898.553
893.559
890.836
889.069
878.556
876.243

## Sheet: Volume
Start	Day 1 Ctl	Day 1 Lip-1	Day 1 SIH	Day 4 Ctl	Day 4 Lip-1	Day 4 SIH	Day 8 Ctl	Day 8 Lip-1	Day 8 SIH
1335.32	3898.25	4069.98	4198.97	6889.55	5447.97	8474.55	6775.61	6745.11	6834.55
1789.92	4075.57	3346.26	3953.7	6209.53	6562.86	7364.95	6674.5	5056.36	8467.92
1754.47	4362.7	4729	3825.72	5618.61	5604.01	7853.77	5824	6771.61	8374.94
1899.21	4307.19	4477.39	4540.12	7042.16	3733.66	7343.59	4939.39	5688.2	7725.72
1739.09	4179.81	4540.71	3671.26	6378.37	4865.54	7944.87	5161.78	4203.12	8438.69
1949.97	4347.3	4599.45	3689.79	6441.91	4902.51	7217.1	5167.49	6588.73	8088.17
1332.49	3739.68	4357.38	4362.22	7136.69	6116.86	8607.88	7575.86	7876.12	7263.91
1628.01	3773.01	4429.47	4057.22	6261.02	4466.75	7320.27	6192.49	6306.22	7343.61
1852.58	4290.84	4405.91	4329.32	6373.51	3509.83	7653.5	7497.82	5988.2	5460.79
1130.73	4171.83	4252.16	4912.84	5183.98	5031.64	6931.95	5807.62	4359.77	7578.87
1893.84	4034.6	4909.67	4658.97	6075.86	5566.88	7450.86	6919.72		7904.43
1924.29	4394.12	4518.12	3791.84	4204.05	4919.4	7742.24	6672.73		7295.58
2008.79	4171.21	3540.87	4639.23	3816.57	5032.9	6313.14	6264.77		8900.95
1986.75	4080.36	4714.37	4239.77	6494.02	5530.19	7275.6	8696.41		7317.42
1732.32	4074.71	4322	4879.14	6964.64	4367.88	6608.73	7432.98		8699.74
2471.46	4260.8	4192.15	4833.52	6210.85	3635.02	7504.11	7574.68		9210.17
1088.03	3309.47	4488.25	3965.25	7351.84	5691.82	6675.16	5502.69		7446.35
1956.91	3893.63	5002.29	3962.2	6949.26	4865.85	7172.54			7805.46
3292.47	4003.61	5419.86	1730.77	6164.81	5599.91	7606.98			7888.6
1757.79	3974.88	4017.89	4142.98	5873.09	4204.07	6718.81			7056.4
1497.25	4833.7	3928.88	4086.88	8267.33	5383.56	6745.29			7241.76
1344.35	4571.1	3343.89	4343.46	7078.81	3347.11	6598.38
1500.71	4136.52	3536.27	4236.79	5200.36	5842.27	7130.29
1587.34	3637.24	3923.1	1916.79	4417.58	5992.42	5086.29
2689.16	4385.4	3924.78	4730.04	3513.01	5230.84	7149.28
1506.7	4008.13	3871.01	4070.27	6765.36	5738.84	7209.92
1348.41	4189.83	3552.62	4555.62	6988.63	6311.04	7804.73
2629.97	3672.39	3432.35	4572.81	4781.9	3573.61	8335.77
1771	5012.11	3333.78	4511.24	5105.4	5476.93	7643.52
1675.38	4558.06	3819.54	4433.96	7355.39	5222.78	5025.86
2230.11	4769.47	4661.29	4304.18	5133.74	3801	6351.87
1837.35	4510.87	3914.13	4057.09	4130.16	3847.39	8276.47
1463.36	4667.94	4576.44	4464.05	5740.12	6075.19	4051.69
1526.33	3804.88	4058.77	4799.49	6304.69	6024.34	6009.47
1279.49	4221.37	3641.86	4771.51	7656.95	4345.98	6074.07
1674.9	4423.87	3638.47	4967.73	6070.73	4872.88	5926.58
1468.99	5085.08	3477.63	4716.33	6230	4814.43	6463.73
1067.73	3925.64	4530.61	4990.05	6108.92	4574.85	5846.14
2178.81	3700.11	4307.29	4614.37	5321.29	3946.75	5962.1
1975.92	4028.22	4482.49	4816.91	3953.68	5146.51	7077.49
1619.9	4172.66	4604.18	5028.84	4478.54	5784.79	7098.97
1673.03	4444.28	4173.14	4685.02	4497.35	5504.82	7028.14
1761.38	4141.74	4454.59	5799.88	6203.51	6621.81	7908.17
1908.54	4901.04	3428.48	4628.66	5541.36	4298.66	7076.52
2352.49	4964.49	3883.48	4120.66	7085.07	4039.03	5845.08
2065.7	4474.41	3895.63	4141.64	5826.5	6712.41	7724.01
1590.65	4258.91	3952.21	4422.67	6612.67	4930.53	7205.27
1629.04	4749.65	5253.71	4316.4	3292.51	4169.84	7886.46
1713.68	4679.46	3949.54	4016.85	5111.61	2258.02	7435.74
2034.36	4393.24	4139.45	4028.09	6988.78		6266.44
1704.45	4139.36	3757.08	4720.65	6449.04		7131.26
1845.48	4382.83	4049.62	3794.8	5787.9		8110.21
2267.51	4185.69	4135.08	4321.67	5645.07		7017.24
1995.13	3598.49	2892.33	4332.59	6359.83		7003.64
1541.65	4054.2	2739.71	3943.17	4861.89		6900.87
1697.94	4493.54	3959.93	4689.56	6108.79		8182.56
1744.34	4140.75	3951.92	3579.43	6103.19		7193.08
1835.61	4089	3005.77	5053.27	5758.42		6898.91
2065.63	5154.48	3883.24	5026.09	4810.04		6681.42
747.819	3838.08	4279.02	4913.38	5049.44		7815.59
1331.56	4391.66	4992.51	4264.89	4481.83		7260.59
1653.47	4598.66	4705.23	4901.83	3323.92		6459.84
2162.12	4591.99	4810.12	3014.55	4971.54		7567.58
2148.55	4691.57	4863.93	4177.63	6208.14		7864.48
1874.69	4732.86	3461.18	4521.78	6622.36		8240.34
1352.93	4042.6	4980.22	5358.53	5420.94		6695.7
2064.28	4563.96	4599.44	4447.23	6507.1		8182.16
1841.5	4910.91	5182.83	3903.11	6461.47		8326.96
2059.88	4559.57	2998.09	5152.98	4134.63
1366.09	4123.99	4118.69	4483.74	4558.03
1796.82	4235.07	4520.9	5455.78	7461.03
1869.56	4636.45	4789.99	3939.75
1511.73	4602.78	3882.23	4044.33
1138.7	3114.84	4643.95	4363.1
2117.89	4913.57	4460.37	3898.87
1883.9	4112.21	4355.8	5230.42
2078.36	4095.39	3626.99	4300.92
1867.06	4827.96	4138.01	4240.47
2170.17	4320.11	4487	5065.71
2263.48	4148.28	4277.4	4618.74
2151.29	5249.41	4477.06	4352.36
1452.21	3466.63	4356.69	4625.3
2548.58		4463.16	4650.97
1977.5		4471.57	4775.86
1877.4		4259.98	5348.4
1248.47		4391.69	2530.69
2005.66		4705.69	4067.28
1378.35		4756.99	3785.97
1604.93		4717.78	5332.36
1559.25		3623.91	4439.81
1923.58		4671.02
2014.51		4444.44
1529.1		3796.52
2349.14		4958.91
1867.02		4597.77
2433.5		3890.76
2009.59		5031.64
1340.94		4307.4
2442.16
2042.17
2086.81
2318.64
1532.57
1606.61
1957.28
2024.34
2183.11
1726.73
2048.28
2018.28
1840.88
1438.44
1344.27
1856.61
2198.7
2177.51
2415.11
3432.16
2405.14
2533.89
2675.64
1929.18
3599.96
3524.31
3818.3

## Sheet: maximum velocity
Ctl 1 DO	Ctl 4 DO	Ctl 8 DO	SIH 4 DO	SIH 8 DO	Lip-1 4 DO	Lip-1 8 DO
0.189321	0.33665	0.173112	0.481745	0.277257	0.325253	0.387767
0.272795	0.0734959	0.12324	0.34844	0.331601	0.626133	0.114301
0.526597	0.495176	0.198613	0.56516	0.42408	0.347917	0.0978797
0.33356	0.140604	0.267343	0.370098	0.499279	0.139325	0.409675
0.379415	0.14793	0.0400383	0.399749	0.645763	0.372536	0.265445
0.616934	0.477137	0.242888	0.344178	0.50796	0.461891	0.276775
0.434911	0.491802	0.0500694	0.3823	0.406182	0.228214	0.2353
0.474829	0.121571	0.0451131	0.497614	0.314503	0.364009	0.149218
0.515412	0.228328	0.0691529	0.361175	0.230264	0.500043	0.207519
0.528169	0.361891	0.0834615	0.412213	0.206045	0.555707	0.438828
0.419674	0.440112	0.354835	0.346599	0.484593	0.452734	0.138929
0.803748	0.0873268	0.099228	0.560044	0.246623	0.490782	0.556297
0.689556	0.222632	0.0852343	0.513703	0.529894	0.443088	0.23049
0.513031	0.407407	0.119344	0.488193	0.605087	0.377137	0.221697
0.82639	0.0483342	0.102367	0.361455	0.213964	0.114049	0.115276
0.735228	0.613443	0.0947662	0.436175	0.417735	0.523159	0.0996075
0.615734	0.247933	0.0376956	0.373932	0.37165	0.33036	0.224872
0.353203	0.0977138	0.0521317	0.359197	0.251809	0.414571	0.0900032
0.417866	0.289358	0.156459	0.260039	0.294169	0.271658	0.110078
0.464219	0.108639	0.380193	0.28297	0.330546	0.100165	0.211598
0.819865	0.279303	0.0795342	0.301867	0.493487	0.586667	0.163142
0.247827	0.276987	0.0588387	0.566615	0.353296	0.154682	0.274094
0.529735	0.555323	0.0442262	0.312062	0.444896	0.426426	0.342615
0.490965	0.297009	0.0641873	0.280907	0.197809	0.132792	0.239888
0.481955	0.465815	0.0624146	0.565208	0.445108	0.195532	0.280112
0.449159	0.100873	0.0685089	0.547555	0.310537	0.183949	0.174712
0.381425	0.154064	0.0922845	0.389849	0.51923	0.42622	0.368804
0.46066	0.194847	0.0797152	0.400582	0.141676	0.720384	0.134889
0.478483	0.247454	0.181874	0.371923	0.157043	0.694851	0.0562172
0.296844	0.546191	0.166759	0.362494	0.123585	0.237281	0.121337
0.485259	0.0430915	0.0928868	0.712736	0.644536	0.607065	0.0729046
0.450836	0.317206	0.0572667	0.440867	0.479668	0.611712	0.216309
0.378407	0.0900563	0.0373777	0.302215	0.597737	0.538471	0.306902
0.680148	0.125608	0.0679721	0.429815	0.12544	0.309592	0.208128
0.334576	0.112257	0.0903421	0.587534	0.222656	0.391823	0.393715
0.67274	0.498027	0.127609	0.550763	0.246578	0.313687	0.241373
0.444102	0.147779	0.199074	0.39682	0.151555	0.542528	0.193885
0.308263	0.102317	0.0614707	0.357503	0.238264	0.421988	0.267565
0.522103	0.297402	0.0825878	0.406131	0.483004	0.0879771	0.14863
0.398933	0.433277	0.121494	0.331439	0.202396	0.527365	0.106014
0.566606	0.152108	0.117663	0.478306	0.173971	0.380804	0.193463
0.69061	0.0995508	0.118662	0.582798	0.309532	0.631902	0.141971
0.232778	0.54694	0.135268	0.363323	0.350649	0.245894	0.132848
0.65394	0.129866	0.113628	0.352659	0.329384	0.454706	0.248274
0.386693	0.138602	0.0609863	0.371369	0.196898	0.586683	0.151984
0.328738	0.0950232	0.168037	0.376021	0.305048	0.494597	0.207314
0.57445	0.484985	0.184569	0.494422	0.167287	0.573901	0.171305
0.34369	0.127902	0.0922257	0.352463	0.179496	0.372131	0.265975
0.498947	0.221132	0.0566676	0.510655	0.170766	0.637497	0.182224
0.813031	0.564089	0.0783	0.425207	0.166221	0.313226	0.186296
0.816252	0.457843	0.0581492	0.373231	0.371349	0.463064	0.347116
0.450606	0.294234	0.0632609	0.358326	0.159914	0.402543	0.214496
0.286896	0.103866	0.104668	0.461797	0.332771	0.411676	0.251963
0.340236	0.0645077	0.0670844	0.463502	0.34975	0.52477	0.153745
0.466999	0.154282	0.0547122	0.3623	0.317062	0.374004	0.127764
0.675565	0.25481	0.0911497	0.596263	0.215819	0.337578	0.134891
0.424401	0.336278	0.0839065	0.551896	0.306086	0.391482	0.151085
0.37314	0.248935	0.0967745	0.372695	0.227077	0.457994	0.181615
0.644036	0.165566	0.0826326	0.377233	0.142703	0.408404	0.237165
0.304014	0.254113	0.122891	0.273688	0.218248	0.241454	0.230164
0.387051	0.232561	0.049243	0.51489	0.298148	0.0978661	0.180995
0.411849	0.221007	0.15193	0.47555	0.208907	0.304362	0.111211
0.483891	0.14423	0.15992	0.374714	0.152658	0.359685	0.109063
0.508181	0.475738	0.0453796	0.365569	0.13668	0.481348	0.161288
0.626141	0.31649	0.111017	0.354973	0.139085	0.557934	0.235842
0.524254	0.139263	0.0899109	0.535895	0.25839	0.436175	0.131661
0.578587	0.276995	0.139699	0.181224	0.251291	0.312214	0.257096
0.388565	0.205398	0.100946	0.43106	0.165523	0.515263	0.160451
0.485566	0.233746	0.0842062	0.34726	0.198928	0.454867	0.147588
0.455071	0.184459	0.120832	0.3215	0.271203	0.0739902	0.219914
0.484897	0.141243	0.0716427	0.105041	0.304303	0.112546	0.236634
0.484742	0.169664	0.187584	0.379465	0.102776	0.595827	0.162373
0.265352	0.357672	0.0810231	0.288982	0.267944	0.327889	0.191578
0.416559	0.25042		0.231834	0.127803	0.376165	0.246536
0.383237	0.0716396		0.24413	0.147972	0.320292	0.184586
0.193311	0.305793		0.119718	0.19287	0.388944	0.192861
0.549095	0.309922		0.303276	0.182099	0.319509	0.233936
0.343917	0.503855		0.443083	0.206697	0.243223	0.202885
0.323072	0.301867		0.373283	0.136004	0.352456	0.156621
0.603997	0.0994582		0.295161	0.194344	0.395683	0.115409
0.318573	0.133377		0.479551	0.252109	0.209402	0.189636
0.183187	0.104561		0.372275	0.118593	0.131952	0.205507
0.432572			0.50597	0.159059	0.304071	0.309773
0.450916			0.184241		0.340008	0.179556
0.68691			0.350937		0.291916	0.406272
0.427524			0.362833		0.274209	0.259903
0.32605			0.412864		0.520301	0.340119
0.316298			0.348372		0.326177	0.114125
0.376724			0.32316		0.499962	0.159924
0.522407			0.552844		0.568466	0.0921272
0.638103			0.399875		0.204833	0.190278
0.417207			0.493529		0.310847	0.210469
0.411593			0.417075		0.140534	0.376398
0.404886			0.280044		0.094548	0.35927
0.387301			0.23854		0.410354	0.117177
0.62611			0.397424		0.336388	0.406892
0.591427			0.224566		0.460349	0.148677
0.353476			0.193311		0.630874	0.150301
0.455213			0.330896		0.41269	0.19766
0.365916					0.182554	0.187258
0.655875					0.270508	0.121461
0.324129					0.432395	0.238579
0.467297					0.0635145	0.0976737
					0.0708439	0.174191
					0.0804188

## Sheet: distance
Ctl 1 DO	Ctl 4 DO	Ctl 8 DO	SIH 4 DO	SIH 8 DO	Lip-1 4 DO	Lip-1 8 DO
1.97681	4.77195	1.06973	6.93788	2.05533	2.91191	3.34985
0.543117	0.537465	3.97705	2.66056	4.27221	0.670495	0.705182
4.64847	0.943954	6.54102	3.79946	3.99156	1.75463	3.0562
2.4196	1.0438	2.5273	4.71364	4.88247	0.813199	0.830567
6.91228	0.911569	0.244749	4.62131	3.51079	4.39168	2.58004
2.15393	4.28273	0.616807	4.68817	2.95381	5.08366	1.77767
5.73362	4.48114	0.321117	4.19154	3.30895	0.691383	1.28182
5.86503	0.820397	0.340459	5.66189	1.72942	1.68621	2.46056
4.19937	1.26678	0.442882	3.78272	0.912558	5.35791	3.48629
5.78636	3.04787	0.606595	4.05535	4.71143	5.69756	0.820011
6.30686	3.15198	1.12309	4.1065	2.1506	6.38975	4.92577
5.83767	0.582386	0.572804	4.11357	4.40923	5.10101	2.1601
4.72282	0.735364	0.382814	6.00946	2.80845	6.17579	1.02833
8.53407	5.21587	0.70828	5.62474	2.24407	2.96435	0.709782
7.70318	0.413427	0.706423	3.76553	5.23513	0.830632	0.728901
6.1279	6.84935	0.691403	6.02434	3.46365	7.81695	1.38993
7.4235	2.756	0.302228	5.23329	2.6744	2.73687	0.548348
5.02264	0.644723	0.400544	4.55949	3.2064	4.56328	0.68948
6.34312	2.39103	0.609547	3.13932	4.83847	2.38332	1.1466
3.19299	0.595464	3.32425	4.16754	3.77257	0.526423	0.966638
6.02473	2.97023	0.442869	4.81913	2.94	4.73305	1.96404
6.74731	1.52073	0.350172	5.47079	3.23787	0.489504	2.9177
7.20118	4.72278	0.305272	4.89556	1.46847	4.29957	1.15959
1.41649	0.82487	0.402307	4.90521	4.42914	0.894916	1.73066
5.02452	5.21999	0.306668	5.08151	2.2337	1.35121	0.929207
5.10127	0.701555	0.520821	5.4701	3.23964	1.28137	1.22573
6.39203	1.04888	0.475912	5.23931	1.3093	6.07385	0.671785
4.17077	0.746279	0.640186	6.38173	1.46539	5.58393	0.233764
3.9787	0.986964	0.889553	5.73609	0.805646	7.30258	0.759533
6.68689	6.31289	0.950702	4.25742	2.43785	1.44884	0.433953
5.44708	0.34653	0.599221	6.95116	4.33311	6.31084	0.375672
2.44348	2.5965	0.401519	5.81628	3.3553	6.98195	2.44137
4.6922	0.34207	0.303601	3.08549	0.781495	4.18577	2.3067
6.44784	0.747511	0.562622	5.16453	1.32036	2.44083	1.85182
3.4529	0.621428	0.724851	6.5545	1.48174	5.78005	3.11995
3.52518	4.43674	0.742413	6.90087	1.21911	2.92878	1.46415
5.74197	0.839896	1.72832	5.0297	2.2922	5.481	3.31085
6.89437	0.591021	0.459066	4.76589	1.22447	4.12602	1.57156
6.7138	1.71005	0.699195	5.75896	1.17235	0.698737	0.910062
4.93086	4.57589	0.759122	4.23621	1.48908	6.53859	1.67034
6.95594	0.956112	0.463347	6.16836	2.45835	4.25601	1.3655
3.90067	0.650276	0.901663	6.08668	3.44056	7.64433	1.22648
6.71404	5.79266	1.06233	4.20636	3.40196	2.07225	3.14455
6.94359	0.188277	0.588757	4.01227	1.89881	5.3172	1.32692
1.27961	0.562975	0.456755	5.5628	1.5564	4.88516	2.04061
4.28636	0.572719	0.88022	5.32741	0.936887	4.27399	2.05655
5.66359	5.01736	2.25519	6.90037	1.55936	4.18278	2.78074
3.29572	0.545876	0.629968	5.24627	1.06129	1.99376	1.43866
7.9412	1.92461	0.377446	6.32242	1.21439	6.385	1.33682
4.0684	6.14862	0.441066	6.54197	4.41851	3.74129	2.90257
7.73478	7.16872	0.436862	4.78435	1.31239	5.73199	1.48718
7.63272	3.30885	0.456187	4.5387	1.06595	5.41658	2.75924
8.3831	0.670772	0.783737	5.85605	1.57684	5.72273	1.4812
4.32404	0.51871	0.37569	4.89194	2.46557	4.88848	0.87233
1.91133	0.484973	0.446877	4.37348	2.2827	3.58092	1.11344
2.02113	1.65679	0.387334	4.11586	2.04739	4.63581	1.2089
7.0454	3.51468	0.591383	5.22264	1.56207	5.56383	1.73137
7.91492	0.940782	0.616061	3.37804	0.809081	4.72513	1.99641
6.3245	1.38876	0.599489	2.05975	1.58081	4.84404	1.00606
5.32613	1.89155	0.879664	3.46855	1.60076	3.09994	1.72017
6.3288	1.95523	0.409918	5.51284	1.22765	0.676264	0.758338
3.57896	1.82504	1.69355	4.4067	0.768268	2.85356	1.03958
5.9828	0.792753	1.41653	3.18842	0.908836	4.1828	1.37031
4.89307	4.85102	0.234571	3.97719	1.04944	4.71363	1.42732
5.16904	3.53868	0.700372	5.46814	1.64018	6.45005	1.50993
6.41485	1.05863	0.530584	5.32904	2.3245	6.58083	2.47819
6.29631	2.77188	1.05672	1.71177	1.25555	2.72952	2.03835
6.07	1.08812	0.594734	5.09228	1.69118	5.42665	1.1166
6.38831	2.16055	0.551492	4.67387	2.43523	5.3771	2.27734
4.64305	1.68302	0.557453	5.01403	1.26283	0.534074	2.62895
7.35277	0.900501	0.433018	0.985617	0.691164	0.590061	1.05691
4.64975	1.32521	1.82271	5.65886	3.19337	3.60975	2.10368
5.95266	4.7734	0.532914	2.99769	1.00756	3.1429	2.9534
5.11176	1.30878		2.72819	0.911156	5.70436	1.37889
3.37349	0.67082		2.58938	1.78448	3.13325	1.63348
5.9029	3.41227		0.840214	1.8091	4.04151	2.63347
4.26172	4.50145		4.78533	0.980264	3.4925	1.74547
1.67216	4.4136		6.64063	1.07077	1.40664	1.62845
6.76107	1.51307		4.59178	1.46134	4.32251	0.800926
4.19716	0.429215		3.84689	2.8393	5.07499	1.86045
4.16533	1.0353		4.88944	0.701711	0.0763348	0.999624
5.54358	0.784131		5.31458	1.11888	0.934081	1.63804
4.34499			6.1897		2.17852	1.14302
1.57117			0.90638		4.9375	1.38269
2.8785			4.56006		3.1265	1.7969
3.51022			4.64618		3.14294	2.87715
5.7206			5.55858		2.09547	0.861863
5.64873			2.76538		2.92545	1.52854
5.14819			2.70192		5.89951	0.646124
4.26504			4.84362		6.16624	1.26756
5.66047			5.06453		1.84001	1.95112
6.10741			4.40238		2.43276	2.37676
5.50663			4.54281		0.677331	3.20082
5.9725			3.70594		0.779819	0.859398
6.3583			3.12379		5.17608	2.23044
5.70076			4.60285		1.42139	1.08328
4.0016			2.7375		5.98784	1.13728
5.98962			1.27234		5.24589	1.5617
2.48937			3.93449		3.68922	0.241679
5.54051					0.889845	0.800593
5.72872					1.13952	1.18261
4.50518					6.64739	0.793311
7.1323					0.370639	1.83033
5.09439					0.534399
7.15627					0.505935

## Sheet: average velocity
Ctl 1 DO	Ctl 4 DO	Ctl 8 DO	SIH 4 DO	SIH 8 DO	Lip-1 4 DO	Lip-1 8 DO
0.0636312	0.153603	0.0350732	0.224527	0.0676097	0.093731	0.112537
0.0859029	0.0176337	0.017488	0.12843	0.0887841	0.144007	0.0221285
0.224182	0.159013	0.0308818	0.211455	0.124982	0.0582934	0.0231207
0.0723604	0.0338165	0.0919019	0.152545	0.132904	0.0271368	0.103366
0.186763	0.0296928	0.00813119	0.149235	0.162029	0.14542	0.0512696
0.194206	0.254924	0.0204015	0.152049	0.117418	0.169455	0.0842234
0.138441	0.145177	0.0107397	0.135649	0.0974854	0.0229188	0.0578416
0.188276	0.0266651	0.0111748	0.182446	0.108847	0.0562069	0.0426801
0.205435	0.0412633	0.0145366	0.144747	0.056394	0.211218	0.0824767
0.189535	0.0985303	0.0200197	0.132384	0.0299527	0.18579	0.116598
0.153671	0.103344	0.0366225	0.13304	0.157749	0.214421	0.0271228
0.281343	0.0190322	0.019009	0.133847	0.0699004	0.170034	0.164375
0.25423	0.0237214	0.0124966	0.195324	0.167228	0.206548	0.0714475
0.200695	0.16953	0.0231717	0.206286	0.094349	0.0991422	0.0340883
0.241808	0.0135402	0.0236526	0.122656	0.0737372	0.0277803	0.0233737
0.260691	0.257817	0.0225949	0.194125	0.173925	0.260565	0.0247926
0.208427	0.0890948	0.0100631	0.168998	0.112822	0.0916364	0.046538
0.145356	0.0210465	0.0135319	0.147397	0.0870194	0.191735	0.0181172
0.197748	0.0783945	0.0202957	0.102369	0.104104	0.0799773	0.0234251
0.220261	0.0196523	0.11044	0.134581	0.157605	0.017865	0.0380507
0.287281	0.097491	0.0145841	0.156127	0.126173	0.160806	0.0315208
0.0472163	0.0494814	0.0116594	0.178395	0.0969229	0.0166121	0.065323
0.235524	0.181413	0.00992217	0.158262	0.11675	0.143959	0.0974733
0.166708	0.027374	0.0132921	0.158403	0.0493328	0.0300644	0.0438131
0.208663	0.170032	0.0114857	0.164806	0.146985	0.0450403	0.0586001
0.136003	0.0230522	0.0169649	0.215358	0.0735577	0.042999	0.0312164
0.129039	0.0350794	0.0153355	0.170108	0.107868	0.202237	0.0402759
0.216638	0.0245756	0.0206512	0.206306	0.0434982	0.2542	0.0221956
0.180966	0.0324659	0.0286337	0.185234	0.0479408	0.24369	0.00831899
0.0802017	0.206079	0.030602	0.139131	0.0271566	0.048728	0.0254877
0.23698	0.0112754	0.0192882	0.224957	0.0917633	0.239652	0.0146112
0.211174	0.0845766	0.0129801	0.224567	0.143957	0.231702	0.0288239
0.115869	0.0111182	0.00980412	0.0997466	0.114126	0.141093	0.0791794
0.114578	0.0240874	0.0181686	0.182063	0.0259346	0.0816332	0.0751367
0.18663	0.0200893	0.0233321	0.262881	0.044012	0.192883	0.0613862
0.226045	0.143894	0.0241043	0.225273	0.0489023	0.109419	0.100861
0.218928	0.0270934	0.0557522	0.162949	0.040279	0.184132	0.0474347
0.161844	0.0195702	0.0147927	0.155578	0.0743417	0.138302	0.107495
0.228563	0.0555813	0.0225063	0.186374	0.0459178	0.0234475	0.0506411
0.129161	0.149539	0.0247003	0.137094	0.0389917	0.218196	0.0293568
0.220857	0.031835	0.0150275	0.199194	0.0492528	0.142819	0.0539399
0.232227	0.0209992	0.0290235	0.197406	0.082959	0.257674	0.0439539
0.0424648	0.188277	0.034195	0.136128	0.1138	0.0700875	0.0395213
0.143038	0.0185381	0.0190742	0.130693	0.111907	0.17724	0.101985
0.185489	0.0184582	0.014878	0.18022	0.0625981	0.238688	0.0429887
0.107586	0.0185346	0.0283637	0.172594	0.0505872	0.141367	0.0656849
0.259234	0.162901	0.072905	0.223313	0.030125	0.139892	0.0663403
0.133244	0.0177233	0.0204093	0.169235	0.0506285	0.0669796	0.0895088
0.252771	0.0633096	0.012416	0.204168	0.0341984	0.222732	0.0467602
0.274888	0.199847	0.0143982	0.211714	0.0391738	0.120947	0.0434502
0.273362	0.230505	0.0140923	0.1545	0.143458	0.184704	0.0936314
0.144135	0.108844	0.0147793	0.14752	0.0428885	0.174541	0.0480768
0.0620561	0.0216146	0.025446	0.188499	0.0343116	0.184604	0.0891037
0.0651979	0.0168048	0.0122508	0.158315	0.0509207	0.159407	0.047832
0.2285	0.0157972	0.014462	0.141232	0.0797919	0.116642	0.0283224
0.25587	0.0536179	0.0128115	0.220887	0.0743552	0.149382	0.0358791
0.204236	0.113866	0.0191386	0.171234	0.0662587	0.203307	0.0395932
0.171811	0.0303152	0.0198516	0.109322	0.0507167	0.182203	0.0572674
0.205703	0.0449436	0.0193383	0.0676067	0.0262121	0.156427	0.0654567
0.115949	0.0608867	0.0286536	0.112372	0.0511588	0.100214	0.0327355
0.192786	0.0636881	0.0134106	0.180355	0.0515267	0.021862	0.0563997
0.158181	0.0590629	0.0554656	0.143853	0.0400319	0.0918528	0.0247018
0.169107	0.0256831	0.0459914	0.102742	0.0247828	0.134929	0.0337894
0.208049	0.164256	0.00756679	0.128573	0.0294758	0.15238	0.0444429
0.210111	0.114028	0.0226657	0.176962	0.0341467	0.207843	0.0462918
0.197292	0.0341861	0.0170972	0.174532	0.0530803	0.212285	0.0493447
0.209912	0.0895117	0.034051	0.0551592	0.0750646	0.0879546	0.0809875
0.150423	0.0356371	0.0192887	0.187446	0.0405016	0.175431	0.0669049
0.237954	0.0699961	0.0178862	0.151258	0.0548492	0.173455	0.0362143
0.152284	0.054291	0.0179438	0.162266	0.0796696	0.0173588	0.0740204
0.194109	0.0289861	0.0140438	0.0318626	0.0410901	0.0190138	0.0849883
0.167416	0.042841	0.0591148	0.18493	0.0223919	0.116947	0.0342416
0.10894	0.153981	0.0173399	0.0968037	0.102901	0.101166	0.068599
0.191032	0.042264		0.089449	0.0326777	0.183617	0.0953746
0.138218	0.0215929		0.0840707	0.0294872	0.101729	0.046637
0.0544087	0.110192		0.0271329	0.0581264	0.131645	0.053093
0.219515	0.145678		0.153869	0.0582955	0.11401	0.0852256
0.136271	0.142989		0.215605	0.0319304	0.045278	0.0572286
0.135384	0.0491258		0.147963	0.0349543	0.139586	0.0526439
0.182957	0.0138905		0.125306	0.0472415	0.164417	0.0264623
0.140463	0.0334687		0.159092	0.0915904	0.0266284	0.0604041
0.0512895	0.0255417		0.171808	0.022857	0.0302291	0.0324553
0.0937623			0.201619	0.0360155	0.0705023	0.0532985
0.114713			0.0293327		0.159618	0.0371915
0.235093			0.147257		0.100855	0.0450877
0.183202			0.149716		0.101276	0.058531
0.167511			0.180278		0.0675233	0.0939221
0.138776			0.0908667		0.0946749	0.0279523
0.182989			0.0872526		0.192794	0.0497357
0.222898			0.15968		0.19934	0.020978
0.179564			0.165688		0.0595471	0.0410658
0.193494			0.1434		0.0792429	0.0632796
0.208469			0.149928		0.0221109	0.0794902
0.18691			0.119675		0.0251015	0.104148
0.129782			0.100659		0.16697	0.0278423
0.195953			0.149605		0.0459006	0.0756937
0.0809991			0.0888797		0.1942	0.0352097
0.180082			0.0410874		0.17069	0.0368448
0.185596			0.126647		0.11965	0.0507594
0.147068					0.0288911	0.0414306
0.245659					0.0368776	0.0263065
0.165941					0.215126	0.0404541
0.23285					0.0121921	0.0260386
					0.0172945	0.0589163
					0.0164621
